# Supplementary material for: Characterisation of internal tremors and vibration symptoms
Source: PubMed Central journal article supplement — BMJ Open. 2023 Dec 28;13(12):e077389. doi: 10.1136/bmjopen-2023-077389 (PMC10759066; doi:10.1136/bmjopen-2023-077389), 2023-12-28
Supplement: bmjopen-2023-077389.draft_revisions.pdf [file bmjopen-2023-077389.draft_revisions.pdf]

# BMJ Open

BMJ Open is committed to open peer review. As part of this commitment we make the peer review history of every article we publish publicly available.

When an article is published we post the peer reviewers' comments and the authors' responses online. We also post the versions of the paper that were used during peer review. These are the versions that the peer review comments apply to.

The versions of the paper that follow are the versions that were submitted during the peer review process. They are not the versions of record or the final published versions. They should not be cited or distributed as the published version of this manuscript.

BMJ Open is an open access journal and the full, final, typeset and author-corrected version of record of the manuscript is available on our site with no access controls, subscription charges or pay-per-view fees (<http://bmjopen.bmj.com>).

If you have any questions on BMJ Open's open peer review process please email [info.bmjopen@bmj.com](mailto:info.bmjopen@bmj.com)

# BMJ Open

## Characterization of internal tremors and vibration symptoms among people with post-acute sequelae of SARS-CoV-2: A narrative analysis of Email and social media comments in a patient advocacy group

|                               |                                                                                                                                                                                                                                                                                                                                                                                                                                                                                                                                                                                                                                                                                                                                                                                                                                                                                                                                                                                                                                                 |
|-------------------------------|-------------------------------------------------------------------------------------------------------------------------------------------------------------------------------------------------------------------------------------------------------------------------------------------------------------------------------------------------------------------------------------------------------------------------------------------------------------------------------------------------------------------------------------------------------------------------------------------------------------------------------------------------------------------------------------------------------------------------------------------------------------------------------------------------------------------------------------------------------------------------------------------------------------------------------------------------------------------------------------------------------------------------------------------------|
| Journal:                      | <i>BMJ Open</i>                                                                                                                                                                                                                                                                                                                                                                                                                                                                                                                                                                                                                                                                                                                                                                                                                                                                                                                                                                                                                                 |
| Manuscript ID                 | bmjopen-2023-077389                                                                                                                                                                                                                                                                                                                                                                                                                                                                                                                                                                                                                                                                                                                                                                                                                                                                                                                                                                                                                             |
| Article Type:                 | Original research                                                                                                                                                                                                                                                                                                                                                                                                                                                                                                                                                                                                                                                                                                                                                                                                                                                                                                                                                                                                                               |
| Date Submitted by the Author: | 06-Jul-2023                                                                                                                                                                                                                                                                                                                                                                                                                                                                                                                                                                                                                                                                                                                                                                                                                                                                                                                                                                                                                                     |
| Complete List of Authors:     | Massey, Dorothy; Yale School of Medicine, Cardiology<br>Sawano, Mitsuaki ; Yale University, Center for Outcomes Research and Evaluation; Yale School of Medicine, Section of Cardiovascular Medicine, Department of Internal Medicine<br>Baker, Anna; Yale School of Medicine, Section of Stroke and Vascular Neurology, Department of Neurology<br>Güthe, Diana ; Survivor Corps<br>Güthe, Nick; Survivor Corps<br>Shidlovsky, Suzanne ; Survivor Corps<br>Fisher, Liza; Survivor Corps<br>Grady, Connor B; University of Pennsylvania Perelman School of Medicine, Department of Biostatistics, Epidemiology, and Informatics<br>Caraballo-Cordovez, Cesar ; Yale University, Center for Outcomes Research and Evaluation; Yale School of Medicine, Department of Internal Medicine<br>Zhou, Tianna; Yale School of Medicine<br>Sharma, Richa; Yale School of Medicine, Department of Neurology<br>Krumholz, Harlan; Yale University, Center for Outcomes Research and Evaluation; Yale School of Medicine, Center for Infection and Immunity |
| Keywords:                     | COVID-19, NEUROLOGY, REGISTRIES                                                                                                                                                                                                                                                                                                                                                                                                                                                                                                                                                                                                                                                                                                                                                                                                                                                                                                                                                                                                                 |
|                               |                                                                                                                                                                                                                                                                                                                                                                                                                                                                                                                                                                                                                                                                                                                                                                                                                                                                                                                                                                                                                                                 |

SCHOLARONE™  
Manuscripts

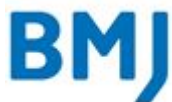

I, the Submitting Author has the right to grant and does grant on behalf of all authors of the Work (as defined in the below author licence), an exclusive licence and/or a non-exclusive licence for contributions from authors who are: i) UK Crown employees; ii) where BMJ has agreed a CC-BY licence shall apply, and/or iii) in accordance with the terms applicable for US Federal Government officers or employees acting as part of their official duties; on a worldwide, perpetual, irrevocable, royalty-free basis to BMJ Publishing Group Ltd ("BMJ") its licensees and where the relevant Journal is co-owned by BMJ to the co-owners of the Journal, to publish the Work in this journal and any other BMJ products and to exploit all rights, as set out in our [licence](#).

The Submitting Author accepts and understands that any supply made under these terms is made by BMJ to the Submitting Author unless you are acting as an employee on behalf of your employer or a postgraduate student of an affiliated institution which is paying any applicable article publishing charge ("APC") for Open Access articles. Where the Submitting Author wishes to make the Work available on an Open Access basis (and intends to pay the relevant APC), the terms of reuse of such Open Access shall be governed by a Creative Commons licence – details of these licences and which [Creative Commons](#) licence will apply to this Work are set out in our licence referred to above.

Other than as permitted in any relevant BMJ Author's Self Archiving Policies, I confirm this Work has not been accepted for publication elsewhere, is not being considered for publication elsewhere and does not duplicate material already published. I confirm all authors consent to publication of this Work and authorise the granting of this licence.

1  
2  
3 **Characterization of internal tremors and vibration symptoms**  
4  
5 **among people with post-acute sequelae of SARS-CoV-2:**  
6  
7 **A narrative analysis of email and social media comments in a patient**  
8  
9 **advocacy group**  
10  
11  
12  
13  
14

15 Dorothy S. Massey, BA;<sup>1</sup> Mitsuaki Sawano, MD, PhD (Co-first author);<sup>2,3</sup>  
16 Anna D. Baker, MPH;<sup>4</sup> Diana Berrent Güthe, JD;<sup>5</sup> Nick Güthe;<sup>5</sup> Suzanne  
17 Pincus Shidlovsky;<sup>5</sup> Liza Fisher;<sup>5</sup> Connor B. Grady, MPH;<sup>6</sup> César Caraballo,  
18 MD;<sup>2,7</sup> Tianna Zhou, BS;<sup>8</sup> Richa Sharma, MD, MPH;<sup>4</sup> Harlan M. Krumholz,  
19 MD, SM<sup>2,3,9,10,11</sup>  
20  
21  
22  
23  
24  
25  
26  
27  
28  
29

30 <sup>1</sup>Department of Internal Medicine, Yale School of Medicine, New Haven,  
31 Connecticut, USA  
32  
33

34 <sup>2</sup>Center for Outcomes Research and Evaluation, Yale New Haven Hospital,  
35 New Haven, Connecticut, USA  
36  
37

38 <sup>3</sup>Section of Cardiovascular Medicine, Department of Internal Medicine, Yale  
39 School of Medicine, New Haven, Connecticut, USA  
40  
41

42 <sup>4</sup>Section of Stroke and Vascular Neurology, Department of Neurology, Yale  
43 School of Medicine, New Haven, Connecticut, USA  
44  
45

46 <sup>5</sup>Survivor Corps, Washington, D.C., USA  
47  
48

49 <sup>6</sup>Department of Biostatistics, Epidemiology, and Informatics, University of  
50 Pennsylvania Perelman School of Medicine, Philadelphia, Pennsylvania, USA  
51  
52  
53  
54  
55  
56  
57

1  
2  
3 <sup>7</sup>Department of Internal Medicine, Yale School of Medicine, New Haven,  
4  
5 Connecticut, United State  
6

7  
8 <sup>8</sup>Yale School of Medicine, New Haven, Connecticut, USA  
9

10 <sup>9</sup>Department of Health Policy and Management, Yale School of Public Health,  
11  
12 New Haven, Connecticut, USA  
13

14  
15 <sup>10</sup>Department of Health Policy and Management, Yale School of Public  
16  
17 Health, New Haven, Connecticut, USA  
18

19  
20 <sup>11</sup>Center for Infection and Immunity, Yale School of Medicine, New Haven,  
21  
22 CT, USA  
23  
24  
25  
26  
27  
28  
29

30 **Address correspondence to:**

31  
32 Harlan M. Krumholz, MD, SM  
33

34  
35 195 Church Street, 5<sup>th</sup> Floor, New Haven, CT 06510  
36

37  
38 Telephone: 203-497-1246; Fax: 203-764-5653  
39

40  
41 Email: harlan.krumholz@yale.edu; Twitter: @hmkyale  
42  
43  
44  
45  
46  
47  
48  
49  
50  
51  
52  
53  
54  
55  
56  
57  
58  
59  
60

**Author emails:**

[dorothy.massey@yale.edu](mailto:dorothy.massey@yale.edu)

[mitsuak.sawano@yale.edu](mailto:mitsuak.sawano@yale.edu)

[ucd4@cdc.gov](mailto:ucd4@cdc.gov)

[dianaguthe74@gmail.com](mailto:dianaguthe74@gmail.com)

[nickguthe1@gmail.com](mailto:nickguthe1@gmail.com)

[spincus13@gmail.com](mailto:spincus13@gmail.com)

[lfisheronu@gmail.com](mailto:lfisheronu@gmail.com)

[connorgrady@g.harvard.edu](mailto:connorgrady@g.harvard.edu)

[cesar.caraballo@yale.edu](mailto:cesar.caraballo@yale.edu)

[tianna.zhou@yale.edu](mailto:tianna.zhou@yale.edu)

[richa.sharma@yale.edu](mailto:richa.sharma@yale.edu)

[harlan.krumholz@yale.edu](mailto:harlan.krumholz@yale.edu)

## Abstract

Objectives: To describe the experiences of patients who have post-acute sequelae SARS-CoV-2 infection (PASC) with internal vibrations and tremors as a prominent component, we leveraged the efforts by Survivor Corps, a grassroots COVID-19 patient advocacy group, to gather information from individuals belonging to its Facebook group with a history of COVID-19 suffering from vibrations and tremors.

Setting and Design: A narrative analysis was performed on 140 emails and 450 social media comments from 140 individuals collected as a response to a call to > 180,000 individuals participating in Survivor Corps between July 15 and July 27, 2021. We used common coding techniques for qualitative data synthesis and the constant comparative method of qualitative data analysis to categorize emails. Comments were analyzed using Word Clouds to visualize frequency of terms.

Main Outcome Measures: Patient-reported long COVID symptom themes and domains related to internal tremors and vibration.

Results: The respondents' emails represented 22 themes and 7 domains pertaining to their experience with internal tremor and vibrations. These domains were: (1) symptom experience, description, and anatomic location; (2) initial symptom onset; (3) symptom timing; (4) symptom triggers or alleviators; (5) change from baseline health status; (6) experience with medical establishment; and (7) impact on individuals' lives and livelihood.

1  
2  
3 There were 22 themes in total, each corresponding to one of the broader  
4 domains. Among the responses, many described symptoms that varied in  
5 location, timing, triggers, occurred soon after their COVID-19 infection, and  
6 were markedly debilitating. There were often frustrating experiences with  
7 the healthcare system.  
8  
9  
10  
11  
12  
13  
14

15 Conclusions: This study describes key themes and experiences among a  
16 group of people reporting long COVID and having a prolonged and  
17 debilitating symptom complex that prominently features internal tremors  
18 and vibrations.  
19  
20  
21  
22  
23  
24  
25  
26  
27  
28  
29  
30  
31  
32  
33  
34  
35  
36  
37  
38  
39  
40  
41  
42  
43  
44  
45  
46  
47  
48  
49  
50  
51  
52  
53  
54  
55  
56  
57  
58  
59  
60



### Strengths and limitations of this study

- This study investigated self-reported symptom experiences from the patient perspective from a convenience sample of patients experiencing internal tremors and vibration symptoms as post-acute sequelae of SARS-CoV-2.
- We used common coding techniques for qualitative data and the constant comparative qualitative data analysis method to identify themes from patients' experiences.
- This study represents a convenience sample and therefore cannot provide information on the incidence and prevalence of these symptoms.

## Summary Box

### What this study adds:

This study contributes to the literature an understanding of the patient perspective regarding internal tremor and vibrations, a potentially important cluster of similar symptoms reported by people with long COVID.

For peer review only

## Introduction

Post-Acute Sequelae of SARS-CoV-2 infection (PASC), also known as long Covid, is a condition that is marked by protean manifestation that varies considerably among individuals.<sup>1-4</sup> The heterogeneity of long COVID necessitates attention to specific clusters of individuals who are suffering from similar symptoms. Proper clustering may enable efforts to identify biological signatures that help elucidate underlying mechanisms to guide the development of diagnostic and therapeutic strategies.

Some individuals with long COVID manifest symptoms that they describe as internal tremors and vibrations. To date, these symptoms, as experienced by patients, have not yet been well described. There are reports of patients with myoclonus, but they are described from the perspective of clinicians.<sup>5-12</sup> No underlying cause of the myoclonus episodes among patients with PASC has been identified, however, other studies have reported cases of myoclonus episodes following COVID-19.<sup>13-15</sup>

To understand the perspective of patients who have PASC with tremors and vibrations as a prominent component, we leveraged the efforts by Survivor Corps, a grassroots COVID-19 patient advocacy group, to gather information from individuals with PASC who belong to its Facebook group and suffer from these symptoms.<sup>16-18</sup> We conducted a qualitative analysis of responses and organized them according to prominent themes. The goal of this study was to characterize the patient perspective and identify a

1  
2  
3 potentially important cluster of similar symptoms that individuals with PASC  
4  
5 are reporting.  
6  
7  
8  
9

## 10 **Methods**

### 11 **Study Design and Sample**

12  
13  
14  
15 This study was a narrative analysis of emails and Facebook comments  
16  
17 that were received from members of Survivor Corps, a long Covid patient  
18  
19 advocacy group where member interact in a Facebook group. The concept  
20  
21 for the study originated with the experience of Heidi Ferrer and the initiative  
22  
23 of her husband, Nick Güthe. Heidi had severe manifestations of the  
24  
25 sensations of vibrations and exhibited tremors with onset early in the  
26  
27 pandemic. Heidi Ferrer ultimately committed suicide as she found the  
28  
29 symptoms intolerable. Nick Güthe spoke with Survivor Corps, which initiated  
30  
31 a call for individuals in its Facebook group of over 180,000 individuals to  
32  
33 report their experience with vibrations and tremors among those with Long  
34  
35 COVID via emails and Facebook comments (Supplemental Table 1.). The  
36  
37 qualitative approach was chosen because previous literature characterizing  
38  
39 the patient perspective on these symptoms is limited.<sup>19</sup> In addition, a study  
40  
41 participant, LF, was involved as a coauthor in the study design and analysis  
42  
43 by reviewing themes before final analysis and providing feedback on the  
44  
45 manuscript. This study received an exemption from the Yale Institutional  
46  
47 Review Board because the comments had been posted publicly.  
48  
49  
50  
51  
52  
53  
54  
55  
56  
57  
58  
59  
60

## Data Collection

Data were collected from unstructured responses that included 140 emails and 450 Facebook comments that occurred in response to Survivor Corps' calls for information in July 2021. Exact dates and names were removed and replaced with month and year and five-year age brackets to protect anonymity. Any information about testing and timing of acute COVID infection were based on self-report.

Survivor Corps collected data for this study in three steps. First, on June 27, 2021, the Survivor Corps founder, Diana Berrent, posted a Facebook poll, titled "Vibration/Buzzing/Pain Poll," in the Survivor Corps Facebook group (Supplemental Table 1). Responses were in a multiple-choice answer format, where respondents could also select multiple answers and add their own answer choices, too. There were 20 answer choices, each a statement relevant to vibration, tingling, buzzing, and neuropathic sensations (Supplemental Table 1). The research team included all poll responses as of July 16, 2021, which totaled 769. In addition, there were 162 Facebook comments posted by group members below the poll as of July 16, 2021, which were all included in data analysis.

Next, Survivor Corps member, Nick Güthe, posted in the Survivor Corps Facebook group on July 14, 2021, requesting that anyone with long Covid in the Facebook group who had experienced "tremors or internal

1  
2  
3 vibrations” and was interested in participating in a study comment below his  
4  
5 post (Supplemental Figure 1). By July 16, 2021, there were 288 comments  
6  
7 from group members in response to Nick Güthe’s post, all of which were  
8  
9 included in data analysis for this study. In response to members’ comments,  
10  
11 Nick Güthe and Diana Berrent Güthe requested that commenters share their  
12  
13 story of these symptoms via email to Survivor Corps for the purposes of the  
14  
15 study.  
16  
17  
18  
19

20  
21 Finally, the Survivor Corps newsletter in July 2021 also included a  
22  
23 request for “Long Haulers” with “Neurological tremors or internal vibrations”  
24  
25 to send details of their symptoms to Survivor Corps via email for this study  
26  
27 (Supplement 1). Survivor Corps received 140 emails for this study between  
28  
29 July 15, 2021, and July 27, 2021. All emails were included in data analysis.  
30  
31 Including the Facebook comments from the initial poll and the comments  
32  
33 from Nick Güthe’s post, 450 Facebook comments were analyzed in this  
34  
35 study.  
36  
37  
38  
39  
40  
41

## 42 **Data Analysis**

### 43 Emails

44  
45  
46  
47 Email data were analyzed using common coding techniques for  
48  
49 qualitative data and the constant comparative method of qualitative data  
50  
51 analysis.<sup>20</sup> Coding of the data was accomplished in iterative steps. An initial  
52  
53 code list was generated after evaluation of the data by research team  
54  
55  
56  
57  
58  
59  
60

1  
2  
3 members (HMK and DM) (Supplement 2). The initial code list was created in  
4  
5 three steps. First, each reviewer separately read the 140 emails (with names  
6  
7 and exact dates redacted). Next, each reviewer separately read the 140  
8  
9 emails while creating themes based on the contents of each email, until each  
10  
11 statement about internal tremors or vibrations in every email had been  
12  
13 assigned to a theme. The reviewers then met to discuss shared themes and  
14  
15 reached a consensus on the list of themes. The reviewers then grouped the  
16  
17 themes into 7 larger domains. At this point, the full research team reviewed  
18  
19 the code structure, including a study participant (LF), for logic and breadth.  
20  
21  
22  
23  
24

25 Using this final version of the code structure, members of the research  
26  
27 team (HMK and DM) independently coded all transcripts, then met as a  
28  
29 group to code in several joint sessions, achieving consensus and assigning  
30  
31 codes to observations by a negotiated, group process. Coded data were  
32  
33 entered into NVivo (version 12, [company, city])[citation] to assist in  
34  
35 reporting recurrent themes, links among the themes, and supporting  
36  
37 quotations.  
38  
39  
40  
41  
42  
43  
44

### 45 Facebook Comments

46  
47 We used Word Cloud methodology to visualize the prevalence of terms  
48  
49 (Supplement 3). A Word Cloud is a visual representation of word frequency  
50  
51 derived from written text. The more often the word appears within the  
52  
53 passage being analyzed, the larger it appears in the image generated. We  
54  
55  
56  
57  
58  
59  
60

1  
2  
3 set the minimum frequency of words to be included in the Word Cloud to 3,  
4 the maximum number of words to 200, and removed extraneous filler  
5 words. Word Clouds were generated using the *quanteda*, *wordcloud*, and *tm*  
6 packages in R v4version 4v4.0.3 (R Development Core Team, Vienna,  
7 Austria).<sup>21,22</sup>  
8  
9  
10  
11  
12  
13  
14  
15  
16  
17

## 18 **Results**

### 19 Email data

20  
21  
22 After review of the email data, respondents' comments reflected 7  
23 domains related to their experience with vibrations and tremors. These  
24 domains were: (1) symptom experience, description, and anatomic location;  
25 (2) initial symptom onset; (3) symptom timing; (4) symptom triggers or  
26 alleviators; (5) change from baseline health status; (6) experience with  
27 medical establishment; and (7) impact on people's lives and livelihood  
28 (Table 1). There were 22 themes total, each corresponding to one of the  
29 broader domains. Sample quotations are listed to illustrate the themes  
30 (Supplemental Figure 2).  
31  
32  
33  
34  
35  
36  
37  
38  
39  
40  
41  
42  
43  
44  
45  
46

#### 47 1) Symptom Experience, Description, and Anatomic Location

48  
49  
50  
51  
52  
53  
54  
55  
56  
57  
58  
59  
60



1  
2  
3 **Theme 1. Vibrations and tremors were described concomitantly, with**  
4 **descriptions of internal vibrations, visible tremors, and some people**  
5 **experiencing both.**  
6  
7  
8  
9

10 *Example 1.*

11  
12  
13 "Sometimes my entire body feels like it's humming and trembling. It's like  
14 I'm sitting on a huge speaker with the volume all the way up. Through the  
15 progression of the last few months, the complete body humming has slowed  
16 down, but still happens 5-8 times a month. My hands and legs also began  
17 trembling about the same time as the whole body. My legs bob up and down  
18 aggressively at times. I'm not cold, I'm not restless, but my legs visibly  
19 move up and down like I'm tapping my foot. My hands have been the worst  
20 of it. I felt like they had improved a few months ago, but they're back with a  
21 vengeance. I'm not hungry ever. I know I need to eat, and my go-to has  
22 been soup. By the time I get the spoon 4 inches above the bowl, and close  
23 to my mouth, all of the broth has been "shaken" off. My handwriting.. awful.  
24 Sometimes I absolutely cannot stand myself and just go to bed. That  
25 happens more often than not. I usually try to hide my hands in my pockets  
26 or under the table, but am not always able to do that. When my whole body  
27 is trembling, I find it a lot more difficult to focus and to get anything  
28 accomplished."  
29  
30  
31  
32  
33  
34  
35  
36  
37  
38  
39  
40  
41  
42  
43  
44  
45  
46  
47  
48  
49  
50  
51  
52  
53

54 *Example 2.*

1  
2  
3 "Internal vibrations started about 3 weeks after. They started in my back  
4 and back of upper thighs. It felt like I was sitting on a vibration massage  
5 chair. They never went away but would vary in intensity. February 2021 I  
6 started having restless left arm at bedtime where my left arm would flap  
7 until I fell asleep. On [May 2021] it progressed to full body myoclonic  
8 movements lasting up to 30 minutes."  
9  
10  
11  
12  
13  
14  
15  
16  
17  
18  
19

20 **Theme 2. Vibration or tremor site varied, from the entire body to**  
21 **localization in extremities, chest, abdomen, and other locations.**  
22  
23

24  
25 *Example 1.*  
26

27 "I experience daily internal tremors/vibrations all over but mainly inside my  
28 brain and chest. I have external tremors in my legs, arms and chest."  
29  
30  
31  
32  
33  
34

35 *Example 2.*  
36

37 "Still suffering with symptoms. One of which is tremors and internal  
38 vibrations primarily in the legs and feet but do sometimes occur in arms."  
39  
40  
41  
42  
43

44 **Theme 3. Vibrations and tremors occurred with other symptoms of**  
45 **varying number.**  
46  
47

48  
49 *Example 1.*  
50  
51  
52  
53  
54  
55  
56  
57

1  
2  
3 "I also experience relentless headaches. I have had the same one, in varying  
4 degrees, since October. Crushing fatigue. Vivid dreams. And the worst, word  
5 retrieval."  
6  
7  
8  
9

10  
11  
12  
13 *Example 2.*

14  
15 "Here is a list of my current symptoms that I have over a year after my  
16 acute infection: 1. Extreme Fatigue 2. Exercise Intolerance/Post-Exertion  
17 Malaise (Physical and Mental) 3. Short-Term Memory Loss. Must carry a  
18 notebook to remember things 4. Brain Fog 5. Muscle Weakness 6. Dizziness.  
19 Can't Drive 7. Seizures 8. Headaches/Migraines 9. High Blood Pressure 10.  
20 Cold Hands and Feet 11. Ringing in Ears Tinnitus 12. Hoarseness/Loss of  
21 Voice 13. Loss of Coordination in Hands 14. Burning Sensation on Skin  
22 Lower Torso"  
23  
24  
25  
26  
27  
28  
29  
30  
31  
32  
33  
34  
35  
36

37 **Theme 4. Vibrations and tremors could cause severe pain.**

38  
39  
40 *Example 1.*

41  
42 "My brain shakes after a few hours inside my head, my face starts to tingle  
43 and numb, and then the full head shaking seizures start. I have severe head  
44 pain and nausea constantly from all the seizures."  
45  
46  
47  
48  
49  
50  
51

52 *Example 2.*

1  
2  
3 “That week of unrelieved spasms left my body barely able to move. Like  
4 paralyzed. I had 3 natural child births. I could not fake such 10/10 pain. I  
5  
6  
7  
8 have never felt such intense pain, I thought my back would break and my  
9  
10  
11 right arm would be completely dislocated twisted out of socket. I could not  
12  
13 breathe at times due to the Laryngeal spasms and diaphragm spasms.”  
14  
15

## 16 17 18 2) Initial Symptom Onset

19  
20 **Theme 5. Vibration and tremor initial onset varied, from the day of**  
21 **initial infection to weeks or even months later.**  
22  
23

### 24 25 *Example 1.*

26  
27 “Symptoms started on [July]. About 3 weeks later, I developed tremors. I've  
28  
29 had them ever since.”  
30  
31  
32  
33

### 34 35 *Example 2.*

36  
37 “I contracted COVID from an ICU patient in May 2020. A few days later  
38  
39 terrible headaches, loss smell, lung, cardio, eye damage. Ongoing problems  
40  
41 fatigue, Headaches, Migraines, Imbalance, Dizzy, Vertigo, SOB, COPD,  
42  
43 Brady/Tachycardia, SVT, chest pain, Gastric, swallow, voice, cognitive,  
44  
45  
46 exercise intolerance, several leaves of absences off work. I had many scans,  
47  
48 tests, labs with both normal results and damage results. I have all Records.  
49  
50  
51 Then few months later unrelenting Neuro issues vibrations, ripples, tremors,  
52  
53  
54 became intense foot cramps, painful ankle, foot drop, leg spasms started  
55  
56  
57

1  
2  
3 mostly r foot. I had to wear ankle brace use cane. Very difficult to sleep.  
4  
5 Husband could see ripples under skin and feel the vibrations at times. Body  
6  
7 is constantly "on", pain, numb, burning, briar patch, walking on nails, spikes  
8  
9 r foot, can't put r foot flat. Also forearms, hands, r side worse."  
10  
11  
12  
13  
14

15 **Theme 6. Vibrations and tremors occurred following or during acute**  
16 **COVID-19 infections that varied from mild to severe.**  
17

18  
19  
20 *Example 1.*  
21

22 "I was diagnosed with COVID-19 in July of 2020. I spent 2 months in the  
23  
24 ICU and 9 days on ECMO."  
25  
26  
27  
28  
29

30 *Example 2.*  
31

32 "I had a moderate case of Covid in November of 2020 with multiple  
33  
34 symptoms. I was never hospitalized. I was recovered one week before my  
35  
36 first Long Covid symptom of shortness of breath began."  
37  
38  
39  
40  
41

42 3) Symptom Timing  
43  
44  
45  
46

47 **Theme 7. Vibration and tremor episodes could be brief, or could be**  
48 **prolonged, even constant.**  
49

50  
51 *Example 1.*  
52  
53  
54  
55  
56  
57  
58  
59  
60

1  
2  
3 “The internal tremors in my chest generally only last for about 5 seconds or  
4 so and then completely subside. The ones in my abdomen are more rare and  
5  
6 have lasted for longer, but still less than a minute or so in general.”  
7  
8  
9

10  
11  
12  
13 *Example 2.*

14  
15 “Now here at almost 8 months post covid, I have dealt with these horrible  
16 tremors daily. They are constant, they don't come and go. They are 24/7. I  
17  
18 feel them more when I am still and resting or at night and early morning, or  
19  
20 during naps. If I can just get up and get going most days, I don't notice  
21  
22 them much, unless the intensity increases and I get breakthrough pain or  
23  
24 headaches. But the night time always reminds me they are still there.”  
25  
26  
27  
28  
29  
30  
31

32 **Theme 8. Vibration and tremor episodes could occur constantly,**  
33 **daily, or only when relapses occurred.**  
34

35  
36  
37 *Example 1.*

38  
39  
40 “The tremors and the dizziness are daily challenges.”  
41  
42  
43

44  
45 *Example 2.*

46  
47 “Tremors and ‘vibrations’ are a few of the many ongoing symptoms. The  
48 tremors I notice in my hands and toes. It lasts for about 10 seconds or less  
49  
50 about every 2 to 3 days. The vibrations I notice when I first lay down for bed  
51  
52 at night. It lasts about seconds.”  
53  
54  
55  
56  
57

1  
2  
3  
4  
5  
6 **Theme 9. Vibration and tremor symptoms could completely resolve**  
7 **temporarily and could return up to months later.**  
8  
9

10 *Example 1.*

11  
12  
13 “Even now, almost eight months out in July, I still occasionally experience  
14 these. They do not occur daily, but do generally happen in conjunction with  
15 the relapse of other symptoms, such as mild chest, throat, and back  
16 pressure/tightness, and tingling in my extremities.”  
17  
18  
19  
20  
21  
22  
23  
24

25 *Example 2.*

26  
27 “Sometimes my entire body feels like it's humming and trembling. It's like  
28 I'm sitting on a huge speaker with the volume all the way up. Through the  
29 progression of the last few months, the complete body humming has slowed  
30 down, but still happens 5-8 times a month. My hands and legs also began  
31 trembling about the same time as the whole body. My legs bop up and down  
32 aggressively at times. I'm not cold, I'm not restless, but my legs visibly  
33 move up and down like I'm tapping my foot. My hands have been the worst  
34 of it. I felt like they had improved a few months ago, but they're back with a  
35 vengeance.”  
36  
37  
38  
39  
40  
41  
42  
43  
44  
45  
46  
47  
48  
49  
50  
51  
52  
53  
54  
55  
56  
57  
58  
59  
60

1  
2  
3 **Theme 10. People experienced vibrations and tremors over different**  
4 **time periods (even if they were episodic), and some did not have**  
5 **improvement in symptoms after more than a year.**  
6  
7  
8  
9

10  
11  
12  
13 *Example 1.*

14  
15 "I got tremors on [December 2020] the day I got covid & it increased to  
16 where I had it in my whole body vibrating on head as well increasing during  
17 activity. It's been very debilitating & frustrating. I have been a patient in  
18 Rochester Minnesota Mayo Covid Clinic and my symptoms have lessened.  
19  
20 However, it is now it is [July] and the tremors have not subsided."  
21  
22  
23  
24  
25  
26  
27  
28  
29

30 *Example 2.*

31  
32 "I had Covid in early February 2020. I did not know I had it. Severe  
33 Headache, sore throat, rash and crushing fatigue. Got better in a flash. 5  
34 months later, the floor dropped out. By early October, hand tremors started.  
35  
36 They have diminished and come back intermittently. It is now 18 Months  
37 after the initial infection."  
38  
39  
40  
41  
42  
43  
44  
45  
46

47 4) Symptom triggers or alleviators  
48  
49  
50

51  
52 **Theme 11. Exercise and activity were associated for some with**  
53 **onsets of tremors and vibrations.**  
54  
55  
56  
57



1  
2  
3 *Example 1.*  
4

5 "Since then I notice that if I get my heart rate up too high (which could be  
6 anything above 110-15) the tremors and vibrations are made worse."  
7  
8  
9

10  
11  
12  
13 *Example 2.*  
14

15 "I have had long covid for 6 months now, and I get  
16 tremors/vibrations/buzzing nerves whenever I overextend myself."  
17  
18  
19

20  
21  
22 **Theme 12. A variety of self-treatment strategies, such as diet**  
23 **modifications and humming, were used to alleviate tremors and**  
24 **vibrations.**  
25  
26  
27  
28  
29

30  
31  
32 *Example 1.*  
33

34 "Regarding the nerve issues, I have found very recently that humming in the  
35 morning helps me to stop the vibrations faster. I suspect our vagus nerve is  
36 being affected."  
37  
38  
39  
40  
41  
42  
43

44 *Example 2.*  
45

46 "I have experimented with supplements, removing medicines, and diet.  
47 Removing all sugar and processed foods from my diet has reduced the  
48 internal vibrations. If I ever slip up, the intensity is extreme."  
49  
50  
51  
52  
53  
54  
55  
56  
57

1  
2  
3 5) Change from Baseline Health Status  
4  
5  
6  
7

8 **Theme 13. People with vibrations and tremors had varying health**  
9 **states before their COVID-19 infection, from those who were**  
10 **completely healthy to those with pre-existing conditions.**  
11  
12  
13

14  
15 *Example 1.*  
16

17 "I was a healthy [30-35-year-old] marathon runner. Now I'm a [30-35-year-  
18 old] individual who is grieving who the person was, figuring out how this  
19 new body works, realizing it still works differently day-to-day, while also  
20 having physicians refuse to treat me."  
21  
22  
23  
24  
25  
26  
27  
28  
29

30 *Example 2.*  
31

32 "I am an extremely physically active [50-55-year-old] peri- menopausal  
33 Canadian female with no pre-existing conditions except for being a migraine  
34 sufferer all my adult life."  
35  
36  
37  
38  
39  
40  
41

42 6) Experience with Medical Establishment  
43  
44  
45  
46

47 **Theme 14. Medical testing failed to reveal the mechanism of either**  
48 **tremors or vibrations.**  
49  
50

51 *Example 1.*  
52  
53  
54  
55  
56  
57  
58  
59  
60

1  
2  
3 "Had a brain CT & brain MRI (all normal). 2. After a short duration of sleep  
4 or a nap (15-30 minutes), upon waking I feel that my heart is racing, like  
5 palpitations. I feel shaky...as if there is a fast motor running inside me. I've  
6 now learned to sit up slowly and give it a few minutes and then it goes  
7 away. Diagnostic cardiac/pulmonary tests I've had: EKGs, CT Thoracic Stress  
8 test, Echocardiogram, Pulmonary Function & Blood Oxygen Stress (all  
9 normal). Had over 50 lab/blood tests and all normal."  
10  
11  
12  
13  
14  
15  
16  
17  
18  
19  
20  
21  
22

23 *Example 2.*

24 "Had MRI that showed micro clots and white matter. Had an EEG but do not  
25 know results."  
26  
27  
28  
29  
30  
31

32 **Theme 15. Tremor and vibration symptoms were sometimes doubted**  
33 **or dismissed by doctors.**  
34  
35

36 *Example 1.*

37 "Some doctors have been very dismissive and charted that 'she just prefers  
38 not to walk'. When I arrived at ER, my previous Neurology MD requested  
39 Pysch consult..this delayed medical evaluation. They did not believe my pain  
40 nor that I could not breathe as my husband begged them to roll me to my  
41 side as they tied me flat to the bed. Most of the time I could barely speak as  
42 spasms affected my mouth. The previous Neurologist told me to 'dumb  
43 myself down as a nurse and quit researching and causing myself stress'.  
44  
45  
46  
47  
48  
49  
50  
51  
52  
53  
54  
55  
56  
57  
58  
59  
60

1  
2  
3  
4  
5  
6 *Example 2.*  
7

8 "In August 2020, when my heart started racing for hours, I tried to speak to  
9  
10 my pulmonologist, and they had a local doctor call who was running a test  
11  
12 site, and wanted to assure me it wasn't possible for me to have Covid  
13  
14 because (1) it wasn't in our area yet, but I was in Boston the day before  
15  
16 they announced an outbreak, (2) that symptoms only last 2 weeks max, and  
17  
18 I explained Long Covid. (3) That I shouldn't read research that I can't  
19  
20 understand, but I used to work in a med related field, trained in pre-med/vet  
21  
22 including epidemiology, was part of a 2010-2015 pandemic task force  
23  
24 related group, and currently work in genetics research, so then she said that  
25  
26 (4) this is all in my head and I just need to get over myself and get back to  
27  
28 work full time (I was) and that work makes people better (fatigue says no).  
29  
30 She yelled at me for over 2 hours. She now is in charge of home bound  
31  
32 patient care and tells people they need to have compassion for Long Covid  
33  
34 as it can take 'a few weeks to recover' and then tells stories about people  
35  
36 who recover quickly being examples of 'good people' while insinuating that  
37  
38 those who stay ill don't want to heal. My doctors have run the gamut of not  
39  
40 believing me; to finally agreeing that Long Covid is real but that since I don't  
41  
42 have a positive test, I can't have it; to even if I have Long Covid, they don't  
43  
44 have treatment, so short of an ER admit, I just need to suck it up."  
45  
46  
47  
48  
49  
50  
51  
52  
53  
54  
55  
56  
57  
58  
59  
60

1  
2  
3 **Theme 16. The vaccine was associated with both improvement in**  
4 **symptoms for some people, and a relapse in symptoms for others.**  
5  
6

7  
8 *Example 1.*  
9

10 "I had slight tremors in my hands after originally getting sick in June 2020  
11 and after my second vaccine, on [May 2021] (two days later) I started  
12 having more seizure-like symptoms."  
13  
14  
15  
16  
17  
18  
19

20 *Example 2.*  
21

22 "I had the internal vibrations intensely during my year of long haul. Since  
23 the vaccine most of my symptoms have abated or significantly diminished. I  
24 do still have some of the internal vibration though, especially after exertion."  
25  
26  
27  
28  
29  
30  
31

32 **Theme 17. Medications have been provided for tremor symptoms,**  
33 **with varying results.**  
34  
35

36 *Example 1.*  
37

38 "They tried Gabapentin but it didn't stop them. From March through [July] I  
39 had 5-9 seizures trying to fall asleep every night, but they only happened at  
40 night. Since the Gabapentni wasn't working they switched me to Topamax. I  
41 was ramping into Topamax throughout June but it wasn't working either. My  
42 family and I got sick again at the end of June with something viral (multiple  
43 negative Covid, Flu, and Strep tests that week). The same time they  
44 adjusted my Topamax dosage up again. Something changed again. Suddenly  
45  
46  
47  
48  
49  
50  
51  
52  
53  
54  
55  
56  
57  
58  
59  
60

1  
2  
3 I was having non-stop seizures back to back and was hospitalized [July] and  
4  
5 also again on [July] at two different hospitals for uncontrolled seizures. My  
6  
7 EEG showed normal and they switched meds again to Keppra. So far I am on  
8  
9 500 mg Keppra 2x day and ramping up, but my seizures are uncontrolled.  
10  
11 The meds work only for a few hours and I have had to go on Short Term  
12  
13 Disability from work.”  
14  
15  
16  
17  
18  
19

20 *Example 2.*

21  
22 “He also put me on the very lowest dose gabapentin 3x per day. I began the  
23  
24 medication the same night. The next day I had a terrible headache but  
25  
26 something felt different. I continued the meds 3x per day like directed. After  
27  
28 1 week I began to be able to get up and move a little. I began doing dishes  
29  
30 and light house work. My family was rejoicing. I was improving. After a few  
31  
32 weeks of being on the medication I could tell it was helping with all the pain.  
33  
34 The tremors were still there, but were farther in the background, if that  
35  
36 makes sense? ..as if they had been put on soft mute. The meds weren't  
37  
38 stopping the tremors but calmed them I guess.”  
39  
40  
41  
42  
43  
44  
45  
46

47 7) Impact on People’s Lives and Livelihood  
48  
49  
50  
51

52 **Theme 18. Vibrations and tremors were associated with mental**  
53  
54 **health effects, including anxiety, depression, and suicidal thoughts.**  
55  
56  
57

1  
2  
3 *Example 1.*  
4

5 "The psychologist who saw me for 30 minutes gaslit me saying I need to  
6 exercise more as my severe depression could be the cause of my symptoms  
7 when I called him on that he said he noted in his report 'as tolerated' that  
8 my chronic fatigue syndrome could also be the cause but he doesn't deal  
9 with that only psychological causes. My therapist says I am clearly  
10 depressed because of my fatigue from what she has seen for a year. Being  
11 in constant pain, unable to participate in life day after day, month after  
12 month is depressing. Of course I feel useless. Of course I feel things might  
13 not get better. I haven't been functioning for 16 months!"  
14  
15  
16  
17  
18  
19  
20  
21  
22  
23  
24  
25  
26  
27  
28  
29

30 *Example 2.*  
31

32 "I could not sleep and went 15 days straight with no sleep. I was suicidal in  
33 addition to all the other Covid symptoms, thus one showed up two months  
34 after my acute Covid."  
35  
36  
37  
38  
39  
40  
41

42 **Theme 19. Vibration and tremor symptoms caused disability for**  
43 **some people.**  
44

45 *Example 1.*  
46

47 "I am writing to advise that I am one of the Covid long-haulers who is  
48 experiencing hand tremors. I feel them in my arms also and occasionally in  
49 my voice and breathing. The tremors in my hands are so severe that I  
50  
51  
52  
53  
54  
55  
56  
57  
58  
59  
60

1  
2  
3 cannot grip or hold a pen for any length of time before my hand writing  
4  
5 deteriorates to chicken scratch. I have also resorted to dictating many of my  
6  
7 emails and messages because my fingers don't hit the right keys. I don't  
8  
9 know if tinnitus qualifies as internal vibration but I do have it and it is  
10  
11 getting louder all the time. It causes me great anxiety and I have not been  
12  
13 able to discover a treatment or solution."  
14  
15  
16  
17  
18  
19

20 *Example 2.*

21  
22 "Since March, I have had limited mobility as my legs give way and do not  
23  
24 have the strength to walk unassisted. I have to use a chair to shower and  
25  
26 walk with a cane. I cannot walk across the room without falling into things  
27  
28 and struggle with balance. I have felt internal tremors that feel like a  
29  
30 fizzing/bubbling that moves through my trunk and extremities. My arms and  
31  
32 legs shake and I have problems even with holding my fork still to feed  
33  
34 myself. My mind doesn't cooperate most days and I have speech issues with  
35  
36 slurred speaking and stuttering."  
37  
38  
39  
40  
41  
42  
43  
44

45 **Theme 20. Vibrations and tremors could disturb or prevent sleep.**

46 *Example 1.*

47  
48 "Mostly Every morning waking up, there is an electrical zap from the top of  
49  
50 my spine to mid back. Before I knew what the correct term was, I was  
51  
52 telling doctors I buzz like a battery. This sensation happens first when I'm  
53  
54  
55  
56  
57  
58  
59  
60



1  
2  
3 opening my eyes in the morning. It's the first conscious feeling in the  
4 morning every day. If I try and go back to sleep the vibrations get more  
5 intense and more upsetting. So the best thing to do upon waking up is just  
6 get up and go on about my day. If I take a nap during the day. No problem,  
7 no vibrations. But there is a limit that I can sleep at any time, so if I do nap  
8 When I wake up, I don't try and sleep more. There is I feel, a component of  
9 the vibrations That affect my sleep. I am very tired and feel most nights that  
10 my brains at war with itself and I don't feel refreshed when waking up.  
11 Sometimes, not very often, I will get a whole body tremor feeling it's  
12 unpleasant but, doesn't last very long. I would say the ones that wake me  
13 up in the morning are more bothersome because I do not wake up gently or  
14 quietly. It really is internal torture."  
15  
16  
17  
18  
19  
20  
21  
22  
23  
24  
25  
26  
27  
28  
29  
30  
31  
32  
33  
34

35 *Example 2.*

36  
37 "Just when I thought I was done developing new symptoms in March this  
38 started, every time I start to fall asleep I get shooting pain and immense  
39 pressure in my arms, legs and spine. It wakes me up instantly. Imagine all  
40 the times you doze off a little in the day, times that by 20 if you are on  
41 medications that make you sleepy and try to imagine how torturous that  
42 symptom is when it happens to you 20 times a day. No one knows what this  
43 is or how to stop it. I'm forced to take muscle relaxers, lyrica, and Ativan to  
44 try to get to sleep before the symptom starts."  
45  
46  
47  
48  
49  
50  
51  
52  
53  
54  
55  
56  
57  
58  
59  
60

1  
2  
3  
4  
5  
6 **Theme 21. Vibration and tremor symptoms could prevent people**  
7  
8 **from working or carrying out daily life activities.**  
9

10 *Example 1.*

11  
12  
13 “I am not the person I was before Covid. I used to paint, refinish furniture,  
14 hang out with girlfriends, dance, golf, bike, travel, date. Now I barely have  
15 the energy to help my patient which is the only reason I have a roof over my  
16 head. If I can't do it at any point, he needs to replace me and I lose my  
17 place to stay. I have no income and I couldn't possibly work.”  
18  
19  
20  
21  
22  
23  
24  
25  
26

27 *Example 2.*

28  
29  
30 “I got covid [September 2020]. I'm a nurse practitioner and cared for  
31 patients with Covid. I tried to go back to work. And after my psych Neuro  
32 testing I was found to have cognitive decline and severe memory recall and  
33 other memory issues. I was pulled from work [March], and then let go  
34 [May].”  
35  
36  
37  
38  
39  
40  
41  
42  
43  
44

45 **Theme 22. Vibration and tremor symptoms could cause financial**  
46 **stress, through a combination of medical care costs and loss of**  
47 **income from medical leave.**  
48  
49

50 *Example 1.*

1  
2  
3 “Before the pandemic was looking for another part time job so could live in a  
4 better place Now am drowning in medical debt with no relief in sight or  
5 ability to hold a job This has devastated my life Now am stuck living in an  
6 old garage without plumbing Hauling water back and forth from a garden  
7 hose and dumping dirty water takes what little energy have.”  
8  
9  
10  
11  
12  
13  
14  
15  
16  
17

18 *Example 2.*

19  
20 “I got Covid [September 2020] and continue to have daily debilitating  
21 symptoms that have prevented me from going back to work. Side note: is  
22 there any government funding for those of us who are long haulers and can’t  
23 get back to work yet? My short term disability ran out beginning of April and  
24 I’ve been without any income since. It’s getting really tough.”  
25  
26  
27  
28  
29  
30  
31  
32  
33  
34

35 Facebook

36  
37 For all 450 comments combined, the 10 most frequent terms were  
38 tremors (64%), COVID (55%), pain (51%), vibrations (43%), months  
39 (36%), burning (29%), feet (24%), hands (22%), legs (21%), and back  
40 (20%). Two Word Clouds were generated based on prevalent terms related  
41 to the themes found in emails.  
42  
43  
44  
45  
46  
47  
48

49 The first Word Cloud (Figure 1) analyzed 288 comments in response to  
50 a post that requested people experiencing tremors or internal vibrations to  
51 comment. This Word Cloud revealed that the five most common words used  
52  
53  
54  
55  
56  
57  
58  
59  
60

1  
2  
3 in comments were: tremors, COVID, vibrations, months, and pain. Words  
4 included also indicated that symptoms ranged in presentation and severity,  
5 and vibrations were mentioned, as were seizures, shaking, and twitching.  
6  
7 This Word Cloud also included other long COVID symptoms including brain  
8 fog, fatigue, and anxiety. Words indicating timing and duration of symptoms  
9 included months, days, and constantly. The only medication captured was  
10 gabapentin. Finally, similarly to the email responses, comments included  
11 mentions of sleep and being tired.  
12  
13  
14  
15  
16  
17  
18  
19  
20  
21

22 The second Word Cloud (Figure 2) was created based on 162  
23 comments to a Survivor Corps poll that asked respondents about vibration  
24 or buzzing sensations and neuropathic pain. This Word Cloud revealed that  
25 pain, burning, COVID, legs, hands, and feet were the most common terms  
26 mentioned in comments. This Word Cloud included terms related to  
27 sensations such as burning and symptoms such as shingles and thrush.  
28  
29  
30  
31  
32  
33  
34  
35  
36  
37  
38  
39

## 40 **Discussion**

41  
42 This study describes key themes and experiences among a group of  
43 individuals reporting long COVID and a prolonged and debilitating symptom  
44 complex that prominently involves internal tremors and vibrations. While  
45 symptom experiences were heterogenous—in symptom timing, medical  
46 history, and initial infection, for instance—there were also common themes  
47 in how individuals described these symptoms and their effects. Individuals  
48  
49  
50  
51  
52  
53  
54  
55  
56  
57  
58  
59  
60

1  
2  
3 also reported how diagnostic evaluation and medical care have not yet  
4  
5 identified possible mechanisms or successful treatment for these symptoms.  
6  
7

8         Although the causal pathway remains unclear from these patient  
9  
10 reports alone, these patient experiences demonstrate the suffering caused  
11  
12 by this symptom complex. Many of the themes identified in this analysis  
13  
14 demonstrate physical suffering, including due to severe pain (Theme 2),  
15  
16 constancy of the tremor episodes (Theme 7), and tremors lasting for months  
17  
18 or even over a year after initial infection (Theme 10). Our findings,  
19  
20 importantly, also demonstrate how the suffering from this symptom complex  
21  
22 invade peoples' lives, livelihood, and psychological wellbeing.  
23  
24 wellbeing. Themes included effects on mental health such as anxiety,  
25  
26 depression, and suicidality (Theme 18), and effects on daily functioning  
27  
28 including inability to exercise (Theme 11), sleep deprivation (Theme 20),  
29  
30 and even disability (Theme 19). The cumulative toll of these limits on daily  
31  
32 functioning and wellbeing led some people to have to  
33  
34 quit or pause working and household or family responsibilities (Theme 21)  
35  
36 and to fall into debt or financial distress consequently (Theme 22). Each  
37  
38 individual's experience with these symptoms was different, and not all  
39  
40 experienced the most severe effects. However, the reports revealed a  
41  
42 pattern that these symptoms could cause immense pain and disruption to  
43  
44 daily lives and livelihood.  
45  
46  
47  
48  
49  
50  
51  
52  
53  
54  
55  
56  
57  
58  
59  
60

1  
2  
3 This study extends the literature in several ways. Previous literature  
4 consists of case series that provide preliminary reports of patients' clinical  
5 presentation, course of care, and outcomes, but information on people's  
6 experience with tremors more broadly has not been described in relation to  
7 PASC.<sup>5-12</sup> In addition, prior literature describes symptoms from the point of  
8 view of healthcare providers, but not from patients themselves. Previous  
9 case-series reports included a total of 16 people previously infected with  
10 SARS-CoV-2 who suffered from myoclonus-ataxia syndrome between 3 days  
11 to 6 weeks after acute, often mild, or moderate, infection.<sup>5-12</sup> Our report  
12 attempts to add a larger, broader overview of experiences of these  
13 symptoms. Our analysis expands upon the sensorimotor symptoms  
14 described to date. Furthermore, we describe symptoms experienced by  
15 individuals who might not have sought formal medical care.

16  
17 This study, although limited in scope, is an effort to channel the  
18 perspective of patients for a condition that has yet to be defined. The utility  
19 of this study is that it may enable more formal and structured data collection  
20 for individuals with this syndrome. These experiences should be more  
21 rigorously characterized to develop hypotheses and understand mechanisms.

22  
23 There are several key implications of the work. First, internal  
24 vibrations and tremors cause severe suffering for a group of individuals after  
25 self-reported SARS-CoV-2 infection. Second, while the overall scale of these  
26 symptoms is still unknown, this group of people experiencing the symptoms

1  
2  
3 have not recovered from the symptoms nor have they received specific  
4  
5 diagnoses or been given treatment that completely alleviates their suffering.  
6  
7  
8 Third, the descriptions of feeling internal vibrations and tremor symptoms  
9  
10 were similar across this group of patients and independent of one another's  
11  
12 responses as the emails were not seen by the other participants.  
13  
14

15 This study has several limitations. Respondents were a convenience  
16  
17 sample with minimal information about their demographic or clinical  
18  
19 characteristics, including laboratory-confirmed infection with COVID-19. Any  
20  
21 information about testing is based on self-report. As such, we cannot  
22  
23 determine whether these symptoms were caused by their infection with  
24  
25 SARS-CoV-2, nor whether the symptoms reported by different people were  
26  
27 the same symptom complex or of the same etiology. We also cannot  
28  
29 determine whether the sample is representative of the source population  
30  
31 experiencing these symptoms. The data are self-reported and cross-  
32  
33 sectional; information was limited to what individuals provided in their initial  
34  
35 communication and there was no follow-up. This limited the scope of  
36  
37 findings and may have excluded information that medical professionals  
38  
39 would have found relevant. This sample may have been skewed toward  
40  
41 individuals healthy enough to be active members of a patient community  
42  
43 (Survivor Corps) and to email a response to the group. Finally, this study  
44  
45 cannot provide information on the incidence and prevalence of these  
46  
47 symptoms.  
48  
49  
50  
51  
52  
53  
54  
55  
56  
57  
58  
59  
60

1  
2  
3 In conclusion, some individuals report experiencing internal vibration  
4 and tremor symptoms, often causing intense suffering, after a self-reported  
5 history of SARS-CoV-2 infection. The symptoms had some common features  
6 but there was variability in timing, concomitant symptoms, and impact.  
7  
8 Further research is needed to understand and alleviate this suffering, by  
9  
10 studying the extent and scope of these symptoms, possible mechanisms,  
11  
12 and potential treatment.  
13  
14  
15  
16  
17  
18  
19  
20  
21  
22  
23  
24  
25  
26  
27  
28  
29  
30  
31  
32  
33  
34  
35  
36  
37  
38  
39  
40  
41  
42  
43  
44  
45  
46  
47  
48  
49  
50  
51  
52  
53  
54  
55  
56  
57  
58  
59  
60



## Competing Interests Statement

In the past 3 years, Dr. Krumholz reported receiving personal fees from the Massachusetts Medical Society, UnitedHealth, IBM Watson Health, Element Science, Aetna, Facebook, Siegfried and Jensen Law Firm, Arnold and Porter Law Firm, Martin and Baughman Law Firm, F-Prime, and the National Center for Cardiovascular Diseases in Beijing; being a cofounder of HugoHealth and Refactor Health; and receiving grants and/or contracts from the Centers for Medicare & Medicaid Services, Johnson & Johnson, Agency for Healthcare Research and Quality, National Institutes of Health, and the American Heart Association, outside the submitted work. The other authors report no potential conflicts.

## Contributor and Guarantor Information

DM and HK had full access to all of the data in the study and take responsibility for the integrity of the data and the accuracy of the data analysis. DM, AB, and HK conducted the analysis and drafted the manuscript. DBG, NG, and SPS generated the study idea. MS, AB, DBG, NG, SPS, LF, CG, CC, TZ, and RS contributed to study design and writing.

## Transparency Statement

DM, MS, and HK affirm that this manuscript is an honest, accurate, and transparent account of the study being reported; no important aspects

1  
2  
3 of the study have been omitted; and there were no discrepancies from the  
4  
5 study as originally planned.  
6  
7  
8  
9

### 10 **Funding Statement**

11  
12 This study received no funding.  
13  
14  
15

### 16 **Data Sharing Statement**

17  
18 Deidentified data will be shared by the corresponding author upon  
19  
20 request.  
21  
22  
23  
24  
25  
26  
27  
28  
29

### 30 **Ethics Approval**

31  
32 This study involves human participants, but the Yale Institutional  
33  
34 Review Board exempted this study.  
35  
36  
37  
38  
39

### 40 **Patient and Public Involvement**

41  
42 Members of the patient advocacy group, Survivor Corps (DBG, NG,  
43  
44 SPS and LF), played a central role in this research, actively engaging  
45  
46 through social media and emails to disseminate surveys, collect responses,  
47  
48 and offer insightful feedback on comprehensive analysis drafts. The  
49  
50 development of research questions was profoundly influenced by the  
51  
52  
53  
54  
55  
56  
57  
58  
59  
60

1  
2  
3 patients' priorities, experiences, and preferences, facilitated through multiple  
4  
5 interactive sessions that prioritized domain and theme shaping.  
6  
7  
8  
9

## 10 REFERENCES

- 11  
12  
13 1. Groff D, Sun A, Ssentongo AE, et al. Short-term and Long-term Rates  
14 of Postacute Sequelae of SARS-CoV-2 Infection: A Systematic Review.  
15 *JAMA Network Open*. 2021;4(10):e2128568-e2128568.  
16  
17
- 18  
19  
20 2. Davis HE, Assaf GS, McCorkell L, et al. Characterizing long COVID in  
21 an international cohort: 7 months of symptoms and their impact.  
22 *EClinicalMedicine*. 2021;38.  
23  
24
- 25  
26  
27 3. Carfi A, Bernabei R, Landi F. Persistent Symptoms in Patients After  
28 Acute COVID-19. *Jama*. 2020;324(6):603-605.  
29  
30
- 31  
32  
33 4. Huang C, Huang L, Wang Y, et al. 6-month consequences of COVID-19  
34 in patients discharged from hospital: a cohort study. *The Lancet*.  
35 2021;397(10270):220-232.  
36  
37
- 38  
39  
40 5. Przytuła F, Błądek S, Sławek J. Two COVID-19-related video-  
41 accompanied cases of severe ataxia-myoclonus syndrome. *Neurol*  
42 *Neurochir Pol*. 2021;55(3):310-313.  
43  
44
- 45  
46  
47 6. Schellekens MMI, Bleeker-Rovers CP, Keurlings PAJ, Mummery CJ,  
48 Bloem BR. Reversible Myoclonus-Ataxia as a Postinfectious  
49 Manifestation of COVID-19. *Movement disorders clinical practice*.  
50 2020;7(8):977-979.  
51  
52  
53  
54  
55  
56  
57

- 1  
2  
3 7. Emamikhah M, Babadi M, Mehrabani M, et al. Opsoclonus-myoclonus  
4 syndrome, a post-infectious neurologic complication of COVID-19:  
5 case series and review of literature. *J Neurovirol.* 2021;27(1):26-34.  
6  
7
- 8 8. Shah PB, Desai SD. Opsoclonus Myoclonus Ataxia Syndrome in the  
9 Setting of COVID-19 Infection. *Neurology.* 2021;96(1):33.  
10  
11
- 12 9. Dijkstra F, Van den Bossche T, Willekens B, Cras P, Crosiers D.  
13 Myoclonus and cerebellar ataxia following Coronavirus Disease 2019  
14 (COVID-19). *Mov Disord Clin Pract.* 2020;7(8):974-976.  
15  
16
- 17 10. Grimaldi S, Lagarde S, Harlé JR, Boucraut J, Guedj E. Autoimmune  
18 Encephalitis Concomitant with SARS-CoV-2 Infection: Insight from  
19 (18)F-FDG PET Imaging and Neuronal Autoantibodies. *J Nucl Med.*  
20 2020;61(12):1726-1729.  
21  
22
- 23 11. Foucard C, San-Galli A, Tarrano C, Chaumont H, Lannuzel A, Roze E.  
24 Acute cerebellar ataxia and myoclonus with or without opsoclonus: a  
25 para-infectious syndrome associated with COVID-19. *Eur J Neurol.*  
26 2021;28(10):3533-3536.  
27  
28
- 29 12. Wright D, Rowley R, Halks-Wellstead P, Anderson T, Wu TY. Abnormal  
30 Saccadic Oscillations Associated with Severe Acute Respiratory  
31 Syndrome Coronavirus 2 Encephalopathy and Ataxia. *Mov Disord Clin  
32 Pract.* 2020;7(8):980-982.  
33  
34  
35  
36  
37  
38  
39  
40  
41  
42  
43  
44  
45  
46  
47  
48  
49  
50  
51  
52  
53  
54  
55  
56  
57

- 1  
2  
3 13. Chan JL, Murphy KA, Sarna JR. Myoclonus and cerebellar ataxia  
4 associated with COVID-19: a case report and systematic review. *J*  
5  
6 *Neurol.* 2021;268(10):3517-3548.  
7  
8  
9
- 10  
11 14. Della Corte M, Delehay C, Savastano E, De Leva MF, Bernardo P,  
12  
13 Varone A. Neuropsychiatric syndrome with myoclonus after SARS-CoV-  
14  
15 2 infection in a paediatric patient. *Clin Neurol Neurosurg.*  
16  
17 2022;213:107121.  
18  
19
- 20  
21 15. Anand P, Zakaria A, Benameur K, et al. Myoclonus in Patients With  
22  
23 Coronavirus Disease 2019: A Multicenter Case Series. *Crit Care Med.*  
24  
25 2020;48(11):1664-1669.  
26  
27
- 28  
29 16. Massey D, Berrent D, Krumholz H. Breakthrough Symptomatic COVID-  
30  
31 19 Infections Leading to Long Covid: Report from Long Covid Facebook  
32  
33 Group Poll. *medRxiv.* 2021:2021.2007.2023.21261030.  
34
- 35  
36 17. Lambert NSC. COVID-19 "Long Hauler" Symptoms Survey Report.  
37  
38 *Indian University School of Medicine.* 2020.  
39
- 40  
41 18. Lambert N, Corps S, El-Azab SA, et al. COVID-19 Survivors' Reports of  
42  
43 the Timing, Duration, and Health Impacts of Post-Acute Sequelae of  
44  
45 SARS-CoV-2 (PASC) Infection. *medRxiv.*  
46  
47 2021:2021.2003.2022.21254026.  
48
- 49  
50 19. Crabtree BF, Miller WL. *Doing qualitative research.* 2nd ed. Thousand  
51  
52 Oaks, Calif.: Sage Publications; 1999.  
53  
54  
55  
56  
57

- 1  
2  
3 20. Miles MB, Huberman AM. *Qualitative data analysis : an expanded*  
4 *sourcebook*. 2nd ed. Thousand Oaks: Sage Publications; 1994.  
5  
6  
7  
8 21. Benoit K WK, Wang H, Nulty P, Obeng A, Müller S, Matsuo A.  
9  
10 quanteda: An R package for the quantitative analysis of textual data.  
11  
12 *Journal of Open Source Software*. 2018;3(30):774.  
13  
14  
15 22. Feinerer I, Hornik K, Meyer D. Text Mining Infrastructure in R. *Journal*  
16 *of Statistical Software*. 2008;25(5):1 - 54.  
17  
18  
19  
20  
21  
22  
23  
24  
25  
26  
27  
28  
29  
30  
31  
32  
33  
34  
35  
36  
37  
38  
39  
40  
41  
42  
43  
44  
45  
46  
47  
48  
49  
50  
51  
52  
53  
54  
55  
56  
57  
58  
59  
60

## Supplement 1

To solicit emails for this study, Survivor Corps and Nick Güthe requested emails from Survivor Corps members via Facebook and an emailed newsletter that is also posted on the Survivor Corps website.

First, Nick Güthe posted the following in the Survivor Corps Facebook page [July 2021]:

*"Hi, to anyone on this group. It's Nick Güthe, Heidi Ferrer's husband. A study is forming with a top doctor for Long Haulers with Neurological tremors similar to Heidi Ferrer's -- Tremors or internal vibrations. If you have these symptoms and want to be included please comment below. This isn't a clinical trial but an attempt to gather data and stories to help get funding, bring attention to these symptoms which are so destructive to any Long Haulers physical and mental health."*

Nick Güthe and Diana Zicklin Berrent responded to Facebook comments on this post to ask members to email their story, writing: "Send your story to [hq@survivorcorps.com](mailto:hq@survivorcorps.com)."

Second, a [newsletter](#) sent to members included the following [July 2021]:

*"A study is forming for Long Haulers with Neurological tremors or internal vibrations. If you have these symptoms and want to be included, please **EMAIL** us with your details. This is not a clinical trial, but an attempt to gather data and stories to help get funding, and bring attention to these destructive symptoms that impact Long Hauler's physical and mental health."*

## Supplement 2. Email Initial Code List

Below is listed the initial code list created by authors HMK and DM, prior to input from all team members and creation of the final code.

### 1) Symptom Perception and Location

Vibrations and tremors were described concomitantly, with descriptions of internal vibrations, visible tremors, and some people experiencing both.

Vibration or tremor site varied, from the entire body to localization in extremities, chest, abdomen and other locations.

Vibrations and tremors occurred with other symptoms of varying number.

Vibrations and tremors could cause severe pain.

### 2) Initial Symptom Onset

Vibration and tremor initial onset varied, from the day of initial infection to weeks later.

Vibrations and tremors occurred following or during acute COVID-19 infections that varied from mild to severe.

### 3) Symptom Timing

Vibration and tremor episodes could be brief, or could be prolonged, even constant.

Vibration and tremor episodes could occur constantly, daily, or only when relapses occurred.

People experienced vibrations and tremors over different time periods (even if they were episodic), and some did not have improvement in symptoms after more than a year.

### 4) Symptom triggers or alleviators

The vaccine was associated with both improvement in symptoms for some people, and a relapse in symptoms for others.

Exercise and activity were associated with onsets of tremors and vibrations.

A variety of self-treatment strategies, such as diet modifications and humming, were used to alleviate tremors and vibrations.

### 5) Change from Baseline Health Status



1  
2  
3 People with vibrations and tremors had varying health states before their COVID-19 infection, from  
4 those who were completely health to those with pre-existing conditions.  
5

## 6) Experience with Medical Establishment

8  
9 Medical testing failed to reveal the mechanism of either tremors or vibrations.

11 Tremor and vibration symptoms were sometimes doubted or dismissed by doctors.

13 Medications have been provided for tremor symptoms, with varying results.  
14

## 7) Effect on People's Lives and Livelihood

17  
18 Vibrations and tremors were associated with mental health effects, ranging from anxiety to suicidal  
19 thoughts.  
20

21 Vibration and tremor symptoms could cause disability people.  
22

23 Vibration and tremor symptoms could cause financial stress, through a combination of medical care  
24 costs and loss of income from medical leave.  
25

26  
27 Vibrations and tremors could disturb or prevent sleep.  
28

29 Vibration and tremor symptoms could prevent people from working or carrying out daily life activities.  
30  
31  
32  
33  
34  
35  
36  
37  
38  
39  
40  
41  
42  
43  
44  
45  
46  
47  
48  
49  
50  
51  
52  
53  
54  
55  
56  
57  
58  
59  
60

### Supplement 3. World Cloud Analysis Methodology

Leveraging the "quanteda" [1], "wordcloud" [2], and "tm" [3] packages in R, we constructed a Word Cloud of the most frequent words used to express some long-term effects of experiencing a COVID-19 infection among a Facebook COVID-19 survivors page. The data was converted from an xlsx to a txt file where it was then loaded as a corpus file, a specific type of file format required for Word Cloud generation, using the "Corpus" function in the "quanteda" package. To clean the corpus file, we utilized the "tm\_map" function in the "tm" package to convert all text to lower case, to remove numbers, to remove punctuation and special characters, and then to collapse extra white space characters to a single blank space. Once cleaned, we built a term-document matrix which was then read into the "wordcloud" function within the "wordcloud" package. We set the minimum frequency of words to be included into the Word Cloud to 3, the maximum number of words allowed into the Word Cloud to 200, and then removed all extraneous, filler words such as "and", "comment", "view", "you." We included all adjectives, nouns, and verbs associated with COVID signs, symptoms, and experiences into the Word Cloud.

#### Works Cited

- [1] K. Benoit, K. Watanabe, H. Wang, P. Nulty, A. Obeng, S. Muller and A. Matsuo, "quanteda: An R package for the quantitative analysis of textual data," *Journal of Open Source Software*, vol. 3, no. 30, p. 774, 2018.
- [2] I. Fellows, "wordcloud: Word Clouds. R package version 2.6," 2018. [Online]. Available: <https://CRAN.R-project.org/package=wordcloud>.
- [3] I. Feinerer and K. Hornik, "Text Mining Infrastructure in R. R package version 0.8-8," *Journal of Statistical Software*, vol. 25, no. 5, pp. 1-54, 2008.

### Supplemental Table 1. Full Survivor Corps Poll for Word Cloud 2

The following poll was posted in Survivor Corps [June 2021] and was titled "Vibration/Buzzing/Pain Poll." There were 20 answer choices, each a statement relevant to vibration, tingling, buzzing, and neuropathic sensations. We have included the poll and responses for context, but for the purposes of qualitative analysis, we reviewed only the comments posted in response to this poll. These poll responses were collected as of July 16, 2021. The following text was included with the Facebook poll:

*"VIBRATION / BUZZING / PAIN POLL*

*SO MANY LONG HAULERS ARE DESCRIBING A BUZZING OR VIBRATION OR  
NEUROPATHIC PAIN IN THEIR BODIES AND EXTREMITIES - WE WANT TO LEARN  
MORE!"*

| <b>Answer Choice</b>                                                        | <b>Number of Votes</b> |
|-----------------------------------------------------------------------------|------------------------|
| I am participating in this poll (please check here!)                        | 769                    |
| I HAVE experienced new tingling / buzzing / vibrating feelings since Covid  | 660                    |
| These vibrating feelings come and go                                        | 590                    |
| I HAVE had neuropathic pain (burning feeling on skin) since Covid           | 396                    |
| These vibrations appear in different parts of my body at different times    | 365                    |
| The neuropathic pain (burning feeling on skin) comes and goes               | 345                    |
| I have these vibrating feelings mostly in my extremities                    | 268                    |
| These vibrations bother me a great deal                                     | 252                    |
| My neuropathic pain (burning feeling on skin) has been in my hands and feet | 232                    |
| The neuropathic pain (burning feeling on skin) bothers me a great deal      | 232                    |
| My neuropathic pain (burning feeling on skin has been all over my body)     | 149                    |

|                                                                                                        |     |
|--------------------------------------------------------------------------------------------------------|-----|
| These vibrations feel "like they are making me insane"                                                 | 129 |
| I have NOT had neuropathic pain (burning feeling on skin) since Covid                                  | 111 |
| I have these vibrating feelings mostly in my chest                                                     | 98  |
| The neuropathic pain (burning feeling on skin) is excruciating / makes me feel "like I'm going insane" | 67  |
| I have NOT experienced any new tingling / buzzing/ vibrating feelings since Covid                      | 48  |
| The neuropathic pain (burning feeling on skin) is constant                                             | 44  |
| These vibrating feelings are constant                                                                  | 35  |
| These vibrations don't bother me                                                                       | 22  |
| The neuropathic pain (burning feeling on skin) doesn't bother me very much                             | 21  |

**Supplemental Figure 1. Data Collection Process**

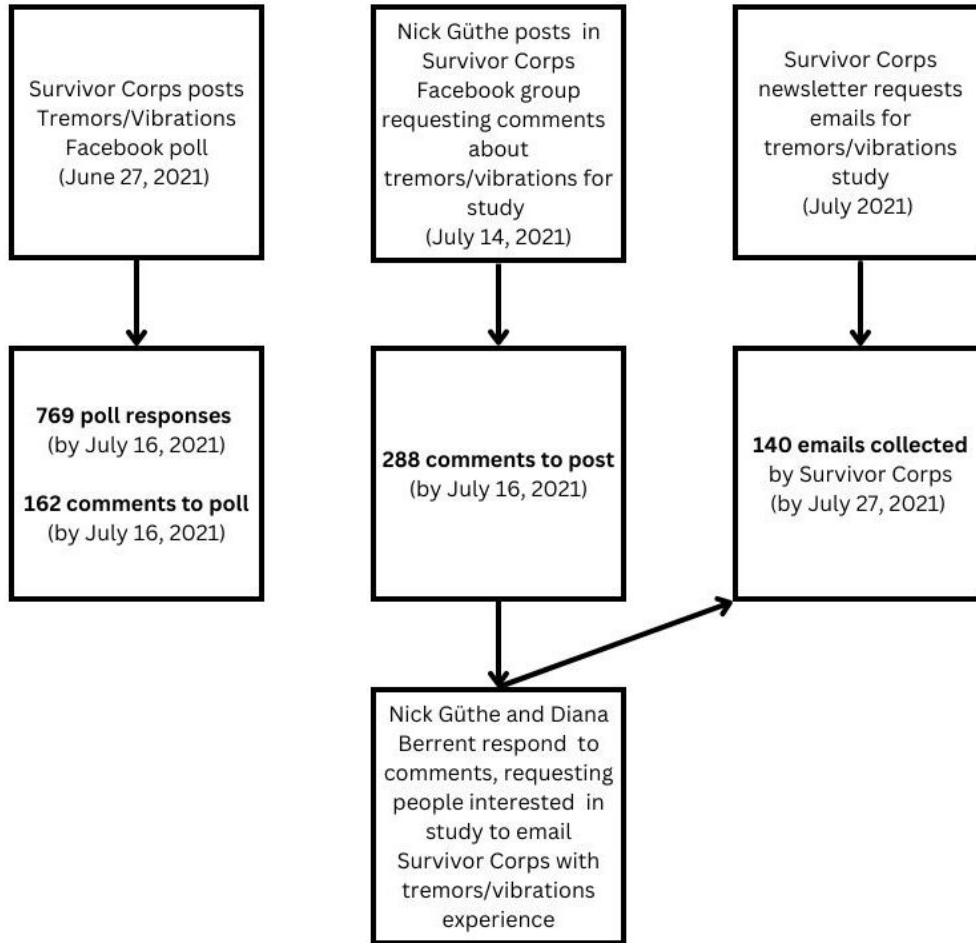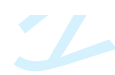

## Supplemental Figure 2. Roadmap of themes and domains

### Domain 1. Symptom Experience, Description, and Anatomic Location

**Theme 1.** Vibrations and tremors were described concomitantly, with descriptions of internal vibrations, visible tremors, and some people experiencing both.

**Theme 2.** Vibration or tremor site varied, from the entire body to localization in extremities, chest, abdomen, and other locations.

**Theme 3.** Vibrations and tremors occurred with other symptoms of varying number.

**Theme 4.** Vibrations and tremors could cause severe pain.

### Domain 2. Initial Symptom Onset

**Theme 5.** Vibration and tremor initial onset varied, from the day of initial infection to weeks or even months later.

**Theme 6.** Vibrations and tremors occurred following or during acute COVID-19 infections that varied from mild to severe.

### Domain 3. Symptom Timing

**Theme 7.** Vibration and tremor episodes could be brief, or could be prolonged, even constant.

**Theme 8.** Vibration and tremor episodes could occur constantly, daily, or only when relapses occurred.

**Theme 9.** Vibration and tremor symptoms could completely resolve temporarily and could return up to months later.

**Theme 10.** People experienced vibrations and tremors over different time periods (even if they were episodic), and some did not have improvement in symptoms after more than a year.

### Domain 4. Symptom triggers or alleviators

**Theme 11.** Exercise and activity were associated for some with onsets of tremors and vibrations.

**Theme 12.** A variety of self-treatment strategies, such as diet modifications and humming, were used to alleviate tremors and vibrations.

### Domain 5. Change from Baseline Health Status

**Theme 13.** People with vibrations and tremors had varying health states before their COVID-19 infection, from those who were completely healthy to those with pre-existing conditions.

### Domain 6. Experience with Medical Establishment

**Theme 14.** Medical testing failed to reveal the mechanism of either tremors or vibrations.

**Theme 15.** Tremor and vibration symptoms were sometimes doubted or dismissed by doctors.

**Theme 16.** The vaccine was associated with both improvement in symptoms for some people, and a relapse in symptoms for others.

**Theme 17.** Medications have been provided for tremor symptoms, with varying results.

### Domain 7. Impact on People's Lives and Livelihood

**Theme 18.** Vibrations and tremors were associated with mental health effects, including anxiety, depression, and suicidal thoughts.

**Theme 19.** Vibration and tremor symptoms caused disability for some people.

**Theme 20.** Vibrations and tremors could disturb or prevent sleep.

**Theme 21.** Vibration and tremor symptoms could prevent people from working or carrying out daily life activities.

**Theme 22.** Vibration and tremor symptoms could cause financial stress, through a combination of medical care costs and loss of income from medical leave.

STROBE Statement—Checklist of items that should be included in reports of *cross-sectional studies*

|                              | Item No | Recommendation                                                                                                                                                                                    | Page No |
|------------------------------|---------|---------------------------------------------------------------------------------------------------------------------------------------------------------------------------------------------------|---------|
| <b>Title and abstract</b>    | 1       | (a) Indicate the study's design with a commonly used term in the title or the abstract                                                                                                            | 1       |
|                              |         | (b) Provide in the abstract an informative and balanced summary of what was done and what was found                                                                                               | 4       |
| <b>Introduction</b>          |         |                                                                                                                                                                                                   |         |
| Background/rationale         | 2       | Explain the scientific background and rationale for the investigation being reported                                                                                                              | 8       |
| Objectives                   | 3       | State specific objectives, including any prespecified hypotheses                                                                                                                                  | 8-9     |
| <b>Methods</b>               |         |                                                                                                                                                                                                   |         |
| Study design                 | 4       | Present key elements of study design early in the paper                                                                                                                                           | 9       |
| Setting                      | 5       | Describe the setting, locations, and relevant dates, including periods of recruitment, exposure, follow-up, and data collection                                                                   | 9       |
| Participants                 | 6       | (a) Give the eligibility criteria, and the sources and methods of selection of participants                                                                                                       | 9       |
| Variables                    | 7       | Clearly define all outcomes, exposures, predictors, potential confounders, and effect modifiers. Give diagnostic criteria, if applicable                                                          | 10-11   |
| Data sources/<br>measurement | 8*      | For each variable of interest, give sources of data and details of methods of assessment (measurement). Describe comparability of assessment methods if there is more than one group              | 10-11   |
| Bias                         | 9       | Describe any efforts to address potential sources of bias                                                                                                                                         | 11-13   |
| Study size                   | 10      | Explain how the study size was arrived at                                                                                                                                                         | 9-11    |
| Quantitative variables       | 11      | Explain how quantitative variables were handled in the analyses. If applicable, describe which groupings were chosen and why                                                                      | 11-13   |
| Statistical methods          | 12      | (a) Describe all statistical methods, including those used to control for confounding                                                                                                             | NA      |
|                              |         | (b) Describe any methods used to examine subgroups and interactions                                                                                                                               | NA      |
|                              |         | (c) Explain how missing data were addressed                                                                                                                                                       | NA      |
|                              |         | (d) If applicable, describe analytical methods taking account of sampling strategy                                                                                                                | NA      |
|                              |         | (e) Describe any sensitivity analyses                                                                                                                                                             | NA      |
| <b>Results</b>               |         |                                                                                                                                                                                                   |         |
| Participants                 | 13*     | (a) Report numbers of individuals at each stage of study—eg numbers potentially eligible, examined for eligibility, confirmed eligible, included in the study, completing follow-up, and analysed | NA      |
|                              |         | (b) Give reasons for non-participation at each stage                                                                                                                                              | NA      |
|                              |         | (c) Consider use of a flow diagram                                                                                                                                                                | NA      |
| Descriptive data             | 14*     | (a) Give characteristics of study participants (eg demographic, clinical, social) and information on exposures and potential confounders                                                          | NA      |
|                              |         | (b) Indicate number of participants with missing data for each variable of interest                                                                                                               | NA      |
| Outcome data                 | 15*     | Report numbers of outcome events or summary measures                                                                                                                                              | NA      |

|                                                                                                                                                                      |                          |    |                                                                                                                                                                                                              |    |
|----------------------------------------------------------------------------------------------------------------------------------------------------------------------|--------------------------|----|--------------------------------------------------------------------------------------------------------------------------------------------------------------------------------------------------------------|----|
| 1<br>2<br>3<br>4<br>5<br>6<br>7<br>8<br>9<br>10<br>11                                                                                                                | Main results             | 16 | (a) Give unadjusted estimates and, if applicable, confounder-adjusted estimates and their precision (eg, 95% confidence interval). Make clear which confounders were adjusted for and why they were included | NA |
| 12<br>13<br>14                                                                                                                                                       |                          |    | (b) Report category boundaries when continuous variables were categorized                                                                                                                                    | NA |
| 15<br>16<br>17<br>18<br>19<br>20<br>21<br>22<br>23<br>24                                                                                                             |                          |    | (c) If relevant, consider translating estimates of relative risk into absolute risk for a meaningful time period                                                                                             | NA |
| 25<br>26<br>27                                                                                                                                                       | Other analyses           | 17 | Report other analyses done—eg analyses of subgroups and interactions, and sensitivity analyses                                                                                                               | NA |
| 28                                                                                                                                                                   | <b>Discussion</b>        |    |                                                                                                                                                                                                              |    |
| 29<br>30<br>31<br>32                                                                                                                                                 | Key results              | 18 | Summarise key results with reference to study objectives                                                                                                                                                     | 33 |
| 33<br>34<br>35<br>36<br>37<br>38<br>39<br>40<br>41<br>42<br>43<br>44<br>45<br>46<br>47<br>48<br>49<br>50<br>51<br>52<br>53<br>54<br>55<br>56<br>57<br>58<br>59<br>60 | Limitations              | 19 | Discuss limitations of the study, taking into account sources of potential bias or imprecision. Discuss both direction and magnitude of any potential bias                                                   | 36 |
|                                                                                                                                                                      | Interpretation           | 20 | Give a cautious overall interpretation of results considering objectives, limitations, multiplicity of analyses, results from similar studies, and other relevant evidence                                   | 33 |
|                                                                                                                                                                      | Generalisability         | 21 | Discuss the generalisability (external validity) of the study results                                                                                                                                        | 36 |
|                                                                                                                                                                      | <b>Other information</b> |    |                                                                                                                                                                                                              |    |
|                                                                                                                                                                      | Funding                  | 22 | Give the source of funding and the role of the funders for the present study and, if applicable, for the original study on which the present article is based                                                | 39 |

\*Give information separately for exposed and unexposed groups.

**Note:** An Explanation and Elaboration article discusses each checklist item and gives methodological background and published examples of transparent reporting. The STROBE checklist is best used in conjunction with this article (freely available on the Web sites of PLoS Medicine at <http://www.plosmedicine.org/>, Annals of Internal Medicine at <http://www.annals.org/>, and Epidemiology at <http://www.epidem.com/>). Information on the STROBE Initiative is available at [www.strobe-statement.org](http://www.strobe-statement.org).



# BMJ Open

## Characterization of internal tremors and vibration symptoms among people with post-acute sequelae of SARS-CoV-2: A narrative analysis of Email and social media comments in a patient advocacy group

|                                 |                                                                                                                                                                                                                                                                                                                                                                                                                                                                                                                                                                                                                                                                                                                                                                                                                                                                                                                                                                                                                                                 |
|---------------------------------|-------------------------------------------------------------------------------------------------------------------------------------------------------------------------------------------------------------------------------------------------------------------------------------------------------------------------------------------------------------------------------------------------------------------------------------------------------------------------------------------------------------------------------------------------------------------------------------------------------------------------------------------------------------------------------------------------------------------------------------------------------------------------------------------------------------------------------------------------------------------------------------------------------------------------------------------------------------------------------------------------------------------------------------------------|
| Journal:                        | <i>BMJ Open</i>                                                                                                                                                                                                                                                                                                                                                                                                                                                                                                                                                                                                                                                                                                                                                                                                                                                                                                                                                                                                                                 |
| Manuscript ID                   | bmjopen-2023-077389.R1                                                                                                                                                                                                                                                                                                                                                                                                                                                                                                                                                                                                                                                                                                                                                                                                                                                                                                                                                                                                                          |
| Article Type:                   | Original research                                                                                                                                                                                                                                                                                                                                                                                                                                                                                                                                                                                                                                                                                                                                                                                                                                                                                                                                                                                                                               |
| Date Submitted by the Author:   | 14-Nov-2023                                                                                                                                                                                                                                                                                                                                                                                                                                                                                                                                                                                                                                                                                                                                                                                                                                                                                                                                                                                                                                     |
| Complete List of Authors:       | Massey, Dorothy; Yale School of Medicine, Cardiology<br>Sawano, Mitsuaki ; Yale University, Center for Outcomes Research and Evaluation; Yale School of Medicine, Section of Cardiovascular Medicine, Department of Internal Medicine<br>Baker, Anna; Yale School of Medicine, Section of Stroke and Vascular Neurology, Department of Neurology<br>Güthe, Diana ; Survivor Corps<br>Güthe, Nick; Survivor Corps<br>Shidlovsky, Suzanne ; Survivor Corps<br>Fisher, Liza; Survivor Corps<br>Grady, Connor B; University of Pennsylvania Perelman School of Medicine, Department of Biostatistics, Epidemiology, and Informatics<br>Caraballo-Cordovez, Cesar ; Yale University, Center for Outcomes Research and Evaluation; Yale School of Medicine, Department of Internal Medicine<br>Zhou, Tianna; Yale School of Medicine<br>Sharma, Richa; Yale School of Medicine, Department of Neurology<br>Krumholz, Harlan; Yale University, Center for Outcomes Research and Evaluation; Yale School of Medicine, Center for Infection and Immunity |
| <b>Primary Subject Heading</b>: | Infectious diseases                                                                                                                                                                                                                                                                                                                                                                                                                                                                                                                                                                                                                                                                                                                                                                                                                                                                                                                                                                                                                             |
| Secondary Subject Heading:      | Qualitative research, Neurology, Immunology (including allergy)                                                                                                                                                                                                                                                                                                                                                                                                                                                                                                                                                                                                                                                                                                                                                                                                                                                                                                                                                                                 |
| Keywords:                       | COVID-19, NEUROLOGY, REGISTRIES                                                                                                                                                                                                                                                                                                                                                                                                                                                                                                                                                                                                                                                                                                                                                                                                                                                                                                                                                                                                                 |
|                                 |                                                                                                                                                                                                                                                                                                                                                                                                                                                                                                                                                                                                                                                                                                                                                                                                                                                                                                                                                                                                                                                 |

SCHOLARONE™  
Manuscripts

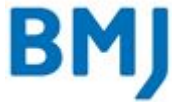

I, the Submitting Author has the right to grant and does grant on behalf of all authors of the Work (as defined in the below author licence), an exclusive licence and/or a non-exclusive licence for contributions from authors who are: i) UK Crown employees; ii) where BMJ has agreed a CC-BY licence shall apply, and/or iii) in accordance with the terms applicable for US Federal Government officers or employees acting as part of their official duties; on a worldwide, perpetual, irrevocable, royalty-free basis to BMJ Publishing Group Ltd ("BMJ") its licensees and where the relevant Journal is co-owned by BMJ to the co-owners of the Journal, to publish the Work in this journal and any other BMJ products and to exploit all rights, as set out in our [licence](#).

The Submitting Author accepts and understands that any supply made under these terms is made by BMJ to the Submitting Author unless you are acting as an employee on behalf of your employer or a postgraduate student of an affiliated institution which is paying any applicable article publishing charge ("APC") for Open Access articles. Where the Submitting Author wishes to make the Work available on an Open Access basis (and intends to pay the relevant APC), the terms of reuse of such Open Access shall be governed by a Creative Commons licence – details of these licences and which [Creative Commons](#) licence will apply to this Work are set out in our licence referred to above.

Other than as permitted in any relevant BMJ Author's Self Archiving Policies, I confirm this Work has not been accepted for publication elsewhere, is not being considered for publication elsewhere and does not duplicate material already published. I confirm all authors consent to publication of this Work and authorise the granting of this licence.

1  
2  
3 **Characterization of internal tremors and vibration symptoms**  
4 **among people with post-acute sequelae of SARS-CoV-2:**  
5 **A narrative analysis of email and social media comments**  
6 **in a patient advocacy group**  
7  
8  
9  
10

11  
12  
13 Dorothy S. Massey, BA;<sup>1</sup> Mitsuaki Sawano, MD, PhD (Co-first author);<sup>2,3</sup> Anna D. Baker,  
14 MPH;<sup>4</sup> Diana Berrent Güthe, JD;<sup>5</sup> Nick Güthe;<sup>5</sup> Suzanne Pincus Shidlovsky;<sup>5</sup> Liza Fisher;<sup>5</sup>  
15 Connor B. Grady, MPH;<sup>6</sup> César Caraballo, MD;<sup>2,7</sup> Tianna Zhou, BS;<sup>8</sup> Richa Sharma, MD,  
16 MPH;<sup>4</sup> Harlan M. Krumholz, MD, SM<sup>2,3,9,10</sup>  
17  
18  
19  
20  
21  
22

23 <sup>1</sup>Department of Internal Medicine, Yale School of Medicine, New Haven, Connecticut, USA

24 <sup>2</sup>Center for Outcomes Research and Evaluation, Yale New Haven Hospital, New Haven,  
25 Connecticut, USA  
26  
27

28 <sup>3</sup>Section of Cardiovascular Medicine, Department of Internal Medicine, Yale School of  
29 Medicine, New Haven, Connecticut, USA  
30  
31

32 <sup>4</sup>Section of Stroke and Vascular Neurology, Department of Neurology, Yale School of  
33 Medicine, New Haven, Connecticut, USA  
34  
35

36 <sup>5</sup>Survivor Corps, Washington, D.C., USA  
37  
38

39 <sup>6</sup>Department of Biostatistics, Epidemiology, and Informatics, University of Pennsylvania  
40 Perelman School of Medicine, Philadelphia, Pennsylvania, USA  
41  
42

43 <sup>7</sup>Department of Internal Medicine, Yale School of Medicine, New Haven, Connecticut, USA  
44  
45

46 <sup>8</sup>Yale School of Medicine, New Haven, Connecticut, USA  
47  
48

49 <sup>9</sup>Department of Health Policy and Management, Yale School of Public Health, New Haven,  
50 Connecticut, USA  
51

52 <sup>10</sup> Center for Infection and Immunity, Yale School of Medicine, New Haven, CT, USA  
53  
54  
55  
56  
57  
58

1  
2  
3  
4  
5  
6  
7  
8  
9  
10  
11  
12  
13  
14  
15  
16  
17  
18  
19  
20  
21  
22  
23  
24  
25  
26  
27  
28  
29  
30  
31  
32  
33  
34  
35  
36  
37  
38  
39  
40  
41  
42  
43  
44  
45  
46  
47  
48  
49  
50  
51  
52  
53  
54  
55  
56  
57  
58  
59  
60

**Address correspondence to:**

Harlan M. Krumholz, MD, SM  
195 Church Street, 5<sup>th</sup> Floor, New Haven, CT 06510  
Telephone: 203-497-1246; Fax: 203-764-5653  
Email: harlan.krumholz@yale.edu; X: @hmkyale

For peer review only

**Author emails:**

[dorothy.massey@yale.edu](mailto:dorothy.massey@yale.edu)

[mitsuaki.sawano@yale.edu](mailto:mitsuaki.sawano@yale.edu)

[ucd4@cdc.gov](mailto:ucd4@cdc.gov)

[dianaguthe74@gmail.com](mailto:dianaguthe74@gmail.com)

[nickguthe1@gmail.com](mailto:nickguthe1@gmail.com)

[spincus13@gmail.com](mailto:spincus13@gmail.com)

[lfisheronu@gmail.com](mailto:lfisheronu@gmail.com)

[connorgrady@g.harvard.edu](mailto:connorgrady@g.harvard.edu)

[cesar.caraballo@yale.edu](mailto:cesar.caraballo@yale.edu)

[tianna.zhou@yale.edu](mailto:tianna.zhou@yale.edu)

[richa.sharma@yale.edu](mailto:richa.sharma@yale.edu)

[harlan.krumholz@yale.edu](mailto:harlan.krumholz@yale.edu)

## Abstract

Objectives: To describe the experiences of patients who have post-acute sequelae SARS-CoV-2 infection (PASC) with internal vibrations and tremors as a prominent component, we leveraged the efforts by Survivor Corps, a grassroots COVID-19 patient advocacy group, to gather information from individuals belonging to its Facebook group with a history of COVID-19 suffering from vibrations and tremors.

Setting and Design: A narrative analysis was performed on 140 emails and 450 social media comments from 140 individuals collected as a response to a call to >180,000 individuals participating in Survivor Corps between July 15 and July 27, 2021. We used common coding techniques and the constant comparative method for qualitative data synthesis and categorizing emails. Coded data were entered into NVivo 12 to identify recurrent themes, theme connections, and supporting quotations. Comments were analyzed using Word Clouds, generated with R version 4.0.3 using *quanteda*, *wordcloud*, and *tm* packages.

Main Outcome Measures: Patient-reported long COVID symptom themes and domains related to internal tremors and vibration.

Results: The respondents' emails represented 22 themes and 7 domains pertaining to their experience with internal tremor and vibrations. These domains were: (1) symptom experience, description, and anatomic location; (2) initial symptom onset; (3) symptom timing; (4) symptom triggers or alleviators; (5) change from baseline health status; (6) experience with medical establishment; and (7) impact on individuals' lives and livelihood. There were 22 themes in total, each corresponding to one of the broader domains. Among the responses, many described symptoms that varied in location, timing, and triggers, occurred soon after their COVID-19 infection, and were markedly debilitating. There were often frustrating experiences with the healthcare system.

Conclusions: This study describes key themes and experiences among a group of people reporting long COVID and having a prolonged and debilitating symptom complex that prominently features internal tremors and vibrations.

### Strengths and limitations of this study

- This study investigated self-reported symptom experiences from the patient perspective from a convenience sample of patients experiencing internal tremors and vibration symptoms as post-acute sequelae of SARS-CoV-2.
- We used common coding techniques for qualitative data and the constant comparative qualitative data analysis method to identify themes from patients' experiences.
- This study represents a convenience sample and therefore cannot provide information on the incidence and prevalence of these symptoms.

1  
2  
3 **Summary Box**  
4

5 **What this study adds:**  
6

7 This study contributes to the literature an understanding of the patient perspective  
8 regarding internal tremor and vibrations, a potentially important cluster of similar symptoms  
9 reported by people with long COVID.  
10  
11  
12  
13  
14  
15  
16  
17  
18  
19  
20  
21  
22  
23  
24  
25  
26  
27  
28  
29  
30  
31  
32  
33  
34  
35  
36  
37  
38  
39  
40  
41  
42  
43  
44  
45  
46  
47  
48  
49  
50  
51  
52  
53  
54  
55  
56  
57  
58  
59  
60

For peer review only



## Introduction

Post-Acute Sequelae of SARS-CoV-2 infection (PASC), also known as long Covid, is a condition that is marked by protean manifestation that varies considerably among individuals.[1-4] Common symptoms among long COVID patients encompass a range of respiratory, metabolic, neuropsychiatric, and pain-related disorders, including postexertional malaise, fatigue, dizziness, brain fog, and gastrointestinal symptoms.[5] The heterogeneity of long COVID necessitates attention to specific clusters of individuals who are suffering from similar symptoms. Proper clustering may enable efforts to identify biological, cognitive, and behavioral signatures of long COVID that help elucidate underlying mechanisms to guide the development of diagnostic and therapeutic strategies.

Some individuals with long COVID manifest symptoms that they describe as internal tremors and vibrations. To date, these symptoms, as experienced by patients, have not yet been well described. There are reports of patients with myoclonus, but they are described from the perspective of clinicians.[6-13] Although no underlying cause of the myoclonus episodes among patients with long COVID has been identified, other studies have reported cases of myoclonus episodes following COVID-19.[14-16]

To understand the perspective of patients who have long COVID with tremors and vibrations as a prominent component, we leveraged the efforts by Survivor Corps, a grassroots COVID-19 patient advocacy group, to gather information from individuals with long COVID who belong to its Facebook group and suffer from these symptoms.[17-19] We conducted a qualitative analysis of responses and organized them according to prominent themes. The goal of this study was to characterize the patient perspective and identify a potentially important cluster of similar symptoms that individuals with long COVID are reporting.

## Methods

### Study Design and Sample

1  
2  
3 This study was a narrative analysis of emails and Facebook comments that were  
4 received from members of Survivor Corps, a long Covid patient advocacy group where  
5 members interact in a Facebook group. The concept for the study originated with the  
6 experience of Heidi Ferrer and the initiative of her husband, NG. Heidi had severe  
7 manifestations of the sensations of vibrations and exhibited tremors with onset early in the  
8 pandemic. Heidi Ferrer ultimately committed suicide as she found the symptoms intolerable.  
9 NG spoke with Survivor Corps, which initiated a call for individuals in its Facebook group of  
10 over 180,000 individuals to report their experience with vibrations and tremors among  
11 those with long COVID via emails and Facebook comments (Supplemental Table 1.). The  
12 qualitative approach was chosen because previous literature characterizing the patient  
13 perspective on these symptoms is limited.[20] In addition, a study participant, LF, was  
14 involved as a coauthor in the study design and analysis by reviewing themes before final  
15 analysis and providing feedback on the manuscript. This study received an exemption from  
16 the Yale Institutional Review Board because the comments had been posted publicly.  
17  
18  
19  
20  
21  
22  
23  
24  
25  
26  
27  
28  
29  
30  
31  
32

### 33 **Data Collection**

34  
35 Data were collected from unstructured responses that included 140 emails and 450  
36 Facebook comments that occurred in response to Survivor Corps' calls for information in  
37 July 2021. Exact dates and names were removed and replaced with month/year and five-  
38 year age brackets to protect anonymity. Any information about testing and timing of acute  
39 COVID infection were based on self-report.  
40  
41  
42  
43  
44

45 Survivor Corps collected data for this study in three steps. First, on June 27, 2021,  
46 the Survivor Corps founder (DBG), posted a Facebook poll, titled "Vibration/Buzzing/Pain  
47 Poll," in the Survivor Corps Facebook group (Supplemental Table 1). Responses were in a  
48 multiple-choice answer format, where respondents could select multiple answers and also  
49 add their own answer choices. There were 20 answer choices, each a statement relevant to  
50 vibration, tingling, buzzing, and neuropathic sensations (Supplemental Table 1). The  
51  
52  
53  
54  
55  
56  
57

1  
2  
3 research team included all poll responses as of July 16, 2021, which totaled 769. In  
4  
5 addition, there were 162 Facebook comments posted by group members below the poll as  
6  
7 of July 16, 2021, which were all included in data analysis.  
8

9  
10 Next, Survivor Corps member NG posted in the Survivor Corps Facebook group on  
11  
12 July 14, 2021, requesting that anyone with long Covid in the group who had experienced  
13  
14 “tremors or internal vibrations” and was interested in participating in a study comment  
15  
16 below his post (Supplemental Figure 1). By July 16, 2021, there were 288 comments from  
17  
18 group members in response to his post, all of which were included in data analysis for this  
19  
20 study. In response to members' comments, NG and DBG requested that commenters share  
21  
22 their symptom stories via email with Survivor Corps for the study, with subjects' consent to  
23  
24 use their deidentified emails for research.

25  
26 Finally, the Survivor Corps newsletter in July 2021 also included a request for “Long  
27  
28 Haulers” with “neurological tremors or internal vibrations” to send details of their symptoms  
29  
30 to Survivor Corps via email for this study (Supplement 1). Survivor Corps received 140  
31  
32 emails for this study between July 15 through July 27, 2021. All emails were included in  
33  
34 data analysis. Including the Facebook comments from the initial poll and the comments  
35  
36 from NG's post, 450 Facebook comments were analyzed in this study.  
37  
38  
39

### 40 **Patient and Public Involvement**

41  
42 Members of the patient advocacy group, Survivor Corps (DBG, NG, SPS and LF),  
43  
44 played a central role in this research, actively engaging through social media and emails to  
45  
46 disseminate surveys, collect responses, and offer insightful feedback on comprehensive  
47  
48 analysis drafts. The development of research questions was profoundly influenced by the  
49  
50 patients' priorities, experiences, and preferences, facilitated through multiple interactive  
51  
52 sessions that prioritized domain and theme shaping.  
53  
54

### 55 **Data Analysis**

### Emails

Email data were analyzed using common coding techniques for qualitative data and the constant comparative method of qualitative data analysis.[21] Coding of the data was accomplished in iterative steps. An initial code list was generated after evaluation of the data by research team members (HMK and DM) (Supplement 2). The initial code list was created in three steps. First, each reviewer separately read the 140 emails (with names and exact dates redacted). Next, each reviewer separately read the 140 emails while creating themes based on the contents of each email, until each statement about internal tremors or vibrations in every email had been assigned to a theme. The reviewers then met to discuss shared themes and reached a consensus on the list of themes. The reviewers then grouped the themes into 7 larger domains. At this point, the full research team reviewed the code structure, including a study participant (LF), for logic and breadth.

Using this final version of the code structure, members of the research team (HMK and DM) independently coded all transcripts, then met to code in several joint sessions, achieving consensus and assigning codes to observations by a negotiated, group process. Coded data were entered into NVivo (version 12, [Lumivero, Denver, CO]) to assist in reporting recurrent themes, links among the themes, and supporting quotations.

### Facebook Comments

We used Word Cloud methodology to visualize the prevalence of terms (Supplement 3). A Word Cloud is a visual representation of word frequency derived from written text. The more often the word appears within the passage being analyzed, the larger it appears in the image generated. We set the minimum frequency of words to be included in the Word Cloud to 3, the maximum number of words to 200, and removed extraneous filler words. Word Clouds were generated using the *quanteda*, *wordcloud*, and *tm* packages in R v4 version 4v4.0.3 (R Development Core Team, Vienna, Austria).[22, 23]

## Results

### Email data

After review of the email data, respondents' comments reflected 7 domains related to their experience with vibrations and tremors. These domains were: (1) symptom experience, description, and anatomic location; (2) initial symptom onset; (3) symptom timing; (4) symptom triggers or alleviators; (5) change from baseline health status; (6) experience with medical establishment; and (7) impact on people's lives and livelihood. There were 22 themes total, each corresponding to one of the broader domains. Sample quotations are listed to illustrate the themes (Supplemental Figure 2).

#### 1) Symptom Experience, Description, and Anatomic Location

##### **Theme 1. Vibrations and tremors were described concomitantly, with descriptions of internal vibrations, visible tremors, and some people experiencing both.**

###### *Example 1.*

"Sometimes my entire body feels like it's humming and trembling. It's like I'm sitting on a huge speaker with the volume all the way up. Through the progression of the last few months, the complete body humming has slowed down, but still happens 5-8 times a month. My hands and legs also began trembling about the same time as the whole body. My legs bob up and down aggressively at times. I'm not cold, I'm not restless, but my legs visibly move up and down like I'm tapping my foot. My hands have been the worst of it. I felt like they had improved a few months ago, but they're back with a vengeance. I'm not hungry ever. I know I need to eat, and my go-to has been soup. By the time I get the spoon 4 inches above the bowl, and close to my mouth, all of the broth has been "shaken" off. My handwriting.. awful. Sometimes I absolutely cannot stand myself and just go to bed. That happens more often than not. I usually try to hide my hands in my pockets or under

1  
2  
3 the table, but am not always able to do that. When my whole body is tremoring, I find it a  
4  
5 lot more difficult to focus and to get anything accomplished.”  
6  
7  
8

9 *Example 2.*

10  
11 “Internal vibrations started about 3 weeks after. They started in my back and back of upper  
12  
13 thighs. It felt like I was sitting on a vibration massage chair. They never went away but  
14  
15 would vary in intensity. February 2021 I started having restless left arm at bedtime where  
16  
17 my left arm would flap until I fell asleep. On [May 2021] it progressed to full body myoclonic  
18  
19 movements lasting up to 30 minutes.”  
20  
21  
22

23 **Theme 2. Vibration or tremor site varied, from the entire body to localization in**  
24  
25 **extremities, chest, abdomen, and other locations.**  
26

27 *Example 1.*

28  
29 “I experience daily internal tremors/vibrations all over but mainly inside my brain and chest.  
30  
31 I have external tremors in my legs, arms and chest.”  
32  
33  
34

35 *Example 2.*

36  
37 “Still suffering with symptoms. One of which is tremors and internal vibrations primarily in  
38  
39 the legs and feet but do sometimes occur in arms.”  
40  
41  
42

43 **Theme 3. Vibrations and tremors occurred with other symptoms of varying**  
44  
45 **number.**  
46

47 *Example 1.*

48  
49 “I also experience relentless headaches. I have had the same one, in varying degrees, since  
50  
51 October. Crushing fatigue. Vivid dreams. And the worst, word retrieval.”  
52  
53  
54

55 *Example 2.*

1  
2  
3 "Here is a list of my current symptoms that I have over a year after my acute infection: 1.  
4 Extreme Fatigue 2. Exercise Intolerance/Post-Exertion Malaise (Physical and Mental) 3.  
5 Short-Term Memory Loss. Must carry a notebook to remember things 4. Brain Fog 5. Muscle  
6 Weakness 6. Dizziness. Can't Drive 7. Seizures 8. Headaches/Migraines 9. High Blood  
7 Pressure 10. Cold Hands and Feet 11. Ringing in Ears Tinnitus 12. Hoarseness/Loss of Voice  
8  
9 13. Loss of Coordination in Hands 14. Burning Sensation on Skin Lower Torso."  
10  
11  
12  
13  
14  
15

#### 16 17 **Theme 4. Vibrations and tremors could cause severe pain.**

##### 18 19 *Example 1.*

20  
21 "My brain shakes after a few hours inside my head, my face starts to tingle and numb, and  
22 then the full head shaking seizures start. I have severe head pain and nausea constantly  
23 from all the seizures."  
24  
25  
26  
27  
28

##### 29 30 *Example 2.*

31  
32 "That week of unrelieved spasms left my body barely able to move. Like paralyzed. I had 3  
33 natural child births. I could not fake such 10/10 pain. I have never felt such intense pain, I  
34 thought my back would break and my right arm would be completely dislocated twisted out  
35 of socket. I could not breathe at times due to the Laryngeal spasms and diaphragm  
36 spasms."  
37  
38  
39  
40  
41  
42  
43

#### 44 2) Initial Symptom Onset

#### 45 46 **Theme 5. Vibration and tremor initial onset varied, from the day of initial infection** 47 **to weeks or even months later.**

##### 48 49 *Example 1.*

50  
51 "Symptoms started on [July]. About 3 weeks later, I developed tremors. I've had them ever  
52 since."  
53  
54  
55  
56  
57

1  
2  
3 *Example 2.*  
4

5 "I contracted COVID from an ICU patient in May 2020. A few days later terrible headaches,  
6 loss smell, lung, cardio, eye damage. Ongoing problems fatigue, Headaches, Migraines,  
7 Imbalance, Dizzy, Vertigo, SOB, COPD, Brady/Tachycardia, SVT, chest pain, Gastric,  
8 swallow, voice, cognitive, exercise intolerance, several leaves of absences off work. I had  
9 many scans, tests, labs with both normal results and damage results. I have all Records.  
10 Then few months later unrelenting Neuro issues vibrations, ripples, tremors, became  
11 intense foot cramps, painful ankle, foot drop, leg spasms started mostly r foot. I had to  
12 wear ankle brace use cane. Very difficult to sleep. Husband could see ripples under skin and  
13 feel the vibrations at times. Body is constantly "on", pain, numb, burning, briar patch,  
14 walking on nails, spikes r foot, can't put r foot flat. Also forearms, hands, r side worse."  
15  
16  
17  
18  
19  
20  
21  
22  
23  
24  
25  
26

27 **Theme 6. Vibrations and tremors occurred following or during acute COVID-19**  
28 **infections that varied from mild to severe.**  
29  
30

31 *Example 1.*  
32

33 "I was diagnosed with COVID-19 in July of 2020. I spent 2 months in the ICU and 9 days on  
34 ECMO."  
35  
36  
37  
38

39 *Example 2.*  
40

41 "I had a moderate case of Covid in November of 2020 with multiple symptoms. I was never  
42 hospitalized. I was recovered one week before my first Long Covid symptom of shortness of  
43 breath began."  
44  
45  
46  
47  
48

49 3) Symptom Timing  
50  
51  
52  
53

54 **Theme 7. Vibration and tremor episodes could be brief, or could be prolonged,**  
55 **even constant.**  
56  
57



1  
2  
3 *Example 1.*  
4

5 “The internal tremors in my chest generally only last for about 5 seconds or so and then  
6 completely subside. The ones in my abdomen are more rare and have lasted for longer, but  
7 still less than a minute or so in general.”  
8  
9  
10

11  
12  
13 *Example 2.*  
14

15 “Now here at almost 8 months post covid, I have dealt with these horrible tremors daily.  
16 They are constant, they don't come and go. They are 24/7. I feel them more when I am still  
17 and resting or at night and early morning, or during naps. If I can just get up and get going  
18 most days, I don't notice them much, unless the intensity increases and I get breakthrough  
19 pain or headaches. But the night time always reminds me they are still there.”  
20  
21  
22  
23  
24  
25

26  
27 **Theme 8. Vibration and tremor episodes could occur constantly, daily, or only**  
28 **when relapses occurred.**  
29

30  
31 *Example 1.*  
32

33 “The tremors and the dizziness are daily challenges.”  
34  
35  
36

37  
38 *Example 2.*  
39

40 “Tremors and ‘vibrations’ are a few of the many ongoing symptoms. The tremors I notice in  
41 my hands and toes. It lasts for about 10 seconds or less about every 2 to 3 days. The  
42 vibrations I notice when I first lay down for bed at night. It lasts about seconds.”  
43  
44  
45  
46

47  
48 **Theme 9. Vibration and tremor symptoms could completely resolve temporarily**  
49 **and could return up to months later.**  
50

51 *Example 1.*  
52  
53  
54  
55  
56  
57

1  
2  
3 "Even now, almost eight months out in July, I still occasionally experience these. They do  
4 not occur daily, but do generally happen in conjunction with the relapse of other symptoms,  
5 such as mild chest, throat, and back pressure/tightness, and tingling in my extremities."  
6  
7  
8  
9

10  
11 *Example 2.*

12  
13 "Sometimes my entire body feels like it's humming and trembling. It's like I'm sitting on a  
14 huge speaker with the volume all the way up. Through the progression of the last few  
15 months, the complete body humming has slowed down, but still happens 5-8 times a  
16 month. My hands and legs also began tremoring about the same time as the whole body.  
17 My legs bob up and down aggressively at times. I'm not cold, I'm not restless, but my legs  
18 visibly move up and down like I'm tapping my foot. My hands have been the worst of it. I  
19 felt like they had improved a few months ago, but they're back with a vengeance."  
20  
21  
22  
23  
24  
25  
26  
27  
28

29 **Theme 10. People experienced vibrations and tremors over different time periods**  
30 **(even if they were episodic), and some did not have improvement in symptoms**  
31 **after more than a year.**  
32  
33  
34  
35  
36  
37

38 *Example 1.*

39 "I got tremors on [December 2020] the day I got covid & it increased to where I had it in  
40 my whole body vibrating on head as well increasing during activity. It's been very  
41 debilitating & frustrating. I have been a patient in Rochester Minnesota Mayo Covid Clinic  
42 and my symptoms have lessened. However, it is now it is [July] and the tremors have not  
43 subsided."  
44  
45  
46  
47  
48  
49  
50

51 *Example 2.*

52 "I had Covid in early February 2020. I did not know I had it. Severe Headache, sore throat,  
53 rash and crushing fatigue. Got better in a flash. 5 months later, the floor dropped out. By  
54  
55  
56  
57

1  
2  
3 early October, hand tremors started. They have diminished and come back intermittently. It  
4 is now 18 Months after the initial infection.”  
5  
6  
7

8  
9 4) Symptom triggers or alleviators  
10  
11

12  
13 **Theme 11. Exercise and activity were associated for some with onsets of tremors**  
14 **and vibrations.**  
15

16  
17 *Example 1.*  
18

19 “Since then I notice that if I get my heart rate up too high (which could be anything above  
20 110-15) the tremors and vibrations are made worse.”  
21  
22  
23

24  
25 *Example 2.*  
26

27 “I have had long covid for 6 months now, and I get tremors/vibrations/buzzing nerves  
28 whenever I overextend myself.”  
29  
30  
31

32  
33 **Theme 12. A variety of self-treatment strategies, such as diet modifications and**  
34 **humming, were used to alleviate tremors and vibrations.**  
35

36  
37 *Example 1.*  
38

39 “Regarding the nerve issues, I have found very recently that humming in the morning helps  
40 me to stop the vibrations faster. I suspect our vagus nerve is being affected.”  
41  
42  
43  
44

45  
46 *Example 2.*  
47

48 “I have experimented with supplements, removing medicines, and diet. Removing all sugar  
49 and processed foods from my diet has reduced the internal vibrations. If I ever slip up, the  
50 intensity is extreme.”  
51  
52  
53  
54  
55  
56  
57

1  
2  
3 5) Change from Baseline Health Status  
4  
5  
6

7 **Theme 13. People with vibrations and tremors had varying health states before**  
8 **their COVID-19 infection, from those who were completely healthy to those with**  
9 **pre-existing conditions.**  
10  
11

12 *Example 1.*  
13

14  
15 "I was a healthy [30-35-year-old] marathon runner. Now I'm a [30-35-year-old] individual  
16 who is grieving who the person was, figuring out how this new body works, realizing it still  
17 works differently day-to-day, while also having physicians refuse to treat me."  
18  
19  
20  
21  
22

23 *Example 2.*  
24

25 "I am an extremely physically active [50-55-year-old] peri- menopausal Canadian female  
26 with no pre-existing conditions except for being a migraine sufferer all my adult life."  
27  
28  
29  
30

31 6) Experience with Medical Establishment  
32  
33  
34

35 **Theme 14. Medical testing failed to reveal the mechanism of either tremors or**  
36 **vibrations.**  
37

38 *Example 1.*  
39

40  
41 "Had a brain CT & brain MRI (all normal). 2. After a short duration of sleep or a nap (15-30  
42 minutes), upon waking I feel that my heart is racing, like palpitations. I feel shaky...as if  
43 there is a fast motor running inside me. I've now learned to sit up slowly and give it a few  
44 minutes and then it goes away. Diagnostic cardiac/pulmonary tests I've had: EKGs, CT  
45 Thoracic Stress test, Echocardiogram, Pulmonary Function & Blood Oxygen Stress (all  
46 normal). Had over 50 lab/blood tests and all normal."  
47  
48  
49  
50  
51  
52  
53  
54  
55

56 *Example 2.*  
57  
58  
59  
60

1  
2  
3 "Had MRI that showed micro clots and white matter. Had an EEG but do not know results."  
4  
5  
6

7 **Theme 15. Tremor and vibration symptoms were sometimes doubted or dismissed**  
8 **by doctors.**  
9

10  
11 *Example 1.*  
12

13 "Some doctors have been very dismissive and charted that 'she just prefers not to walk.'  
14  
15 When I arrived at ER, my previous Neurology MD requested Pysch consult..this delayed  
16  
17 medical evaluation. They did not believe my pain nor that I could not breathe as my  
18  
19 husband begged them to roll me to my side as they tied me flat to the bed. Most of the time  
20  
21 I could barely speak as spasms affected my mouth. The previous Neurologist told me to  
22  
23 'dumb myself down as a nurse and quit researching and causing myself stress'. "  
24  
25  
26

27  
28 *Example 2.*  
29

30 "In August 2020, when my heart started racing for hours, I tried to speak to my  
31  
32 pulmonologist, and they had a local doctor call who was running a test site, and wanted to  
33  
34 assure me it wasn't possible for me to have Covid because (1) it wasn't in our area yet, but  
35  
36 I was in Boston the day before they announced an outbreak, (2) that symptoms only last 2  
37  
38 weeks max, and I explained Long Covid. (3) That I shouldn't read research that I can't  
39  
40 understand, but I used to work in a med related field, trained in pre-med/vet including  
41  
42 epidemiology, was part of a 2010-2015 pandemic task force related group, and currently  
43  
44 work in genetics research, so then she said that (4) this is all in my head and I just need to  
45  
46 get over myself and get back to work full time (I was) and that work makes people better  
47  
48 (fatigue says no). She yelled at me for over 2 hours. She now is in charge of home bound  
49  
50 patient care and tells people they need to have compassion for Long Covid as it can take 'a  
51  
52 few weeks to recover' and then tells stories about people who recover quickly being  
53  
54 examples of 'good people' while insinuating that those who stay ill don't want to heal. My  
55  
56 doctors have run the gamut of not believing me; to finally agreeing that Long Covid is real  
57  
58  
59  
60

1  
2  
3 but that since I don't have a positive test, I can't have it; to even if I have Long Covid, they  
4 don't have treatment, so short of an ER admit, I just need to suck it up.”  
5  
6  
7  
8

9 **Theme 16. The vaccine was associated with both improvement in symptoms for**  
10 **some people, and a relapse in symptoms for others.**  
11

12 *Example 1.*  
13

14  
15 “I had slight tremors in my hands after originally getting sick in June 2020 and after my  
16 second vaccine, on [May 2021] (two days later) I started having more seizure-like  
17 symptoms.”  
18  
19  
20  
21  
22

23 *Example 2.*  
24

25 “I had the internal vibrations intensely during my year of long haul. Since the vaccine most  
26 of my symptoms have abated or significantly diminished. I do still have some of the internal  
27 vibration though, especially after exertion.”  
28  
29  
30  
31  
32

33 **Theme 17. Medications have been provided for tremor symptoms, with varying**  
34 **results.**  
35

36 *Example 1.*  
37

38  
39 “They tried Gabapentin but it didn’t stop them. From March through [July] I had 5-9  
40 seizures trying to fall asleep every night, but they only happened at night. Since the  
41 Gabapentni wasn’t working they switched me to Topamax. I was ramping into Topamax  
42 throughout June but it wasn’t working either. My family and I got sick again at the end of  
43 June with something viral (multiple negative Covid, Flu, and Strep tests that week). The  
44 same time they adjusted my Topamax dosage up again. Something changed again.  
45 Suddenly I was having non-stop seizures back to back and was hospitalized [July] and also  
46 again on [July] at two different hospitals for uncontrolled seizures. My EEG showed normal  
47 and they switched meds again to Keppra. So far I am on 500 mg Keppra 2x day and  
48  
49  
50  
51  
52  
53  
54  
55  
56  
57

1  
2  
3 ramping up, but my seizures are uncontrolled. The meds work only for a few hours and I  
4  
5 have had to go on Short Term Disability from work.”  
6  
7  
8

9 *Example 2.*

10  
11 “He also put me on the very lowest dose gabapentin 3x per day. I began the medication the  
12 same night. The next day I had a terrible headache but something felt different. I continued  
13 the meds 3x per day like directed. After 1 week I began to be able to get up and move a  
14 little. I began doing dishes and light house work. My family was rejoicing. I was improving.  
15 After a few weeks of being on the medication I could tell it was helping with all the pain. The  
16 tremors were still there, but were farther in the background, if that makes sense? ..as if  
17 they had been put on soft mute. The meds weren't stopping the tremors but calmed them I  
18 guess.”  
19  
20  
21  
22  
23  
24  
25  
26  
27  
28

29 7) Impact on People's Lives and Livelihood  
30  
31  
32

33 **Theme 18. Vibrations and tremors were associated with mental health effects,**  
34 **including anxiety, depression, and suicidal thoughts.**  
35  
36

37 *Example 1.*

38  
39 “The psychologist who saw me for 30 minutes gaslit me saying I need to exercise more as  
40 my severe depression could be the cause of my symptoms when I called him on that he said  
41 he noted in his report 'as tolerated' that my chronic fatigue syndrome could also be the  
42 cause but he doesn't deal with that only psychological causes. My therapist says I am  
43 clearly depressed because of my fatigue from what she has seen for a year. Being in  
44 constant pain, unable to participate in life day after day, month after month is depressing.  
45 Of course I feel useless. Of course I feel things might not get better. I haven't been  
46 functioning for 16 months!”  
47  
48  
49  
50  
51  
52  
53  
54  
55  
56  
57

1  
2  
3 *Example 2.*  
4

5 "I could not sleep and went 15 days straight with no sleep. I was suicidal in addition to all  
6 the other Covid symptoms, thus one showed up two months after my acute Covid."  
7  
8  
9

10  
11 **Theme 19. Vibration and tremor symptoms caused disability for some people.**  
12

13 *Example 1.*  
14

15 "I am writing to advise that I am one of the Covid long-haulers who is experiencing hand  
16 tremors. I feel them in my arms also and occasionally in my voice and breathing. The  
17 tremors in my hands are so severe that I cannot grip or hold a pen for any length of time  
18 before my hand writing deteriorates to chicken scratch. I have also resorted to dictating  
19 many of my emails and messages because my fingers don't hit the right keys. I don't know  
20 if tinnitus qualifies as internal vibration but I do have it and it is getting louder all the time.  
21 It causes me great anxiety and I have not been able to discover a treatment or solution."  
22  
23  
24  
25  
26  
27  
28  
29  
30

31 *Example 2.*  
32

33 "Since March, I have had limited mobility as my legs give way and do not have the strength  
34 to walk unassisted. I have to use a chair to shower and walk with a cane. I cannot walk  
35 across the room without falling into things and struggle with balance. I have felt internal  
36 tremors that feel like a fizzing/bubbling that moves through my trunk and extremities. My  
37 arms and legs shake and I have problems even with holding my fork still to feed myself. My  
38 mind doesn't cooperate most days and I have speech issues with slurred speaking and  
39 stuttering."  
40  
41  
42  
43  
44  
45  
46  
47  
48  
49

50 **Theme 20. Vibrations and tremors could disturb or prevent sleep.**  
51

52 *Example 1.*  
53

54 "Mostly Every morning waking up, there is an electrical zap from the top of my spine to mid  
55 back. Before I knew what the correct term was, I was telling doctors I buzz like a battery.  
56  
57  
58  
59  
60



1  
2  
3 This sensation happens first when I'm opening my eyes in the morning. It's the first  
4 conscious feeling in the morning every day. If I try and go back to sleep the vibrations get  
5 more intense and more upsetting. So the best thing to do upon waking up is just get up and  
6 go on about my day. If I take a nap during the day. No problem, no vibrations. But there is  
7 a limit that I can sleep at any time, so if I do nap When I wake up, I don't try and sleep  
8 more. There is I feel, a component of the vibrations That affect my sleep. I am very tired  
9 and feel most nights that my brains at war with itself and I don't feel refreshed when  
10 waking up. Sometimes, not very often, I will get a whole body tremor feeling it's unpleasant  
11 but, doesn't last very long. I would say the ones that wake me up in the morning are more  
12 bothersome because I do not wake up gently or quietly. It really is internal torture."  
13  
14  
15  
16  
17  
18  
19  
20  
21  
22  
23  
24

25 *Example 2.*

26  
27 "Just when I thought I was done developing new symptoms in March this started, every  
28 time I start to fall asleep I get shooting pain and immense pressure in my arms, legs and  
29 spine. It wakes me up instantly. Imagine all the times you doze off a little in the day, times  
30 that by 20 if you are on medications that make you sleepy and try to imagine how torturous  
31 that symptom is when it happens to you 20 times a day. No one knows what this is or how  
32 to stop it. I'm forced to take muscle relaxers, lyrica, and Ativan to try to get to sleep before  
33 the symptom starts."  
34  
35  
36  
37  
38  
39  
40  
41  
42  
43  
44  
45  
46  
47

48 **Theme 21. Vibration and tremor symptoms could prevent people from working or  
49 carrying out daily life activities.**

50 *Example 1.*

51 "I am not the person I was before Covid. I used to paint, refinish furniture, hang out with  
52 girlfriends, dance, golf, bike, travel, date. Now I barely have the energy to help my patient  
53 which is the only reason I have a roof over my head. If I can't do it at any point, he needs  
54 to replace me and I lose my place to stay. I have no income and I couldn't possibly work."  
55  
56  
57  
58  
59  
60

1  
2  
3  
4  
5 *Example 2.*

6  
7 "I got covid [September 2020]. I'm a nurse practitioner and cared for patients with Covid. I  
8  
9 tried to go back to work. And after my psych Neuro testing I was found to have cognitive  
10  
11 decline and severe memory recall and other memory issues. I was pulled from work  
12  
13 [March], and then let go [May]."

14  
15  
16  
17 **Theme 22. Vibration and tremor symptoms could cause financial stress, through a**  
18 **combination of medical care costs and loss of income from medical leave.**

19  
20  
21 *Example 1.*

22  
23 "Before the pandemic was looking for another part time job so could live in a better place  
24  
25 Now am drowning in medical debt with no relief in sight or ability to hold a job This has  
26  
27 devastated my life Now am stuck living in an old garage without plumbing Hauling water  
28  
29 back and forth from a garden hose and dumping dirty water takes what little energy have."  
30  
31

32  
33  
34 *Example 2.*

35  
36 "I got Covid [September 2020] and continue to have daily debilitating symptoms that have  
37  
38 prevented me from going back to work. Side note: is there any government funding for  
39  
40 those of us who are long haulers and can't get back to work yet? My short term disability  
41  
42 ran out beginning of April and I've been without any income since. It's getting really tough."  
43  
44

45  
46 Facebook

47  
48 For all 450 comments combined, the 10 most frequent terms were tremors (64%),  
49  
50 COVID (55%), pain (51%), vibrations (43%), months (36%), burning (29%), feet (24%),  
51  
52 hands (22%), legs (21%), and back (20%). Two Word Clouds were generated based on  
53  
54 prevalent terms related to the themes found in emails.

1  
2  
3 The first Word Cloud (Figure 1) analyzed 288 comments in response to a post that  
4 requested people experiencing tremors or internal vibrations to comment. This Word Cloud  
5 revealed that the five most common words used in comments were: tremors, COVID,  
6 vibrations, months, and pain. Words included also indicated that symptoms ranged in  
7 presentation and severity, and vibrations were mentioned, as were seizures, shaking, and  
8 twitching. This Word Cloud also included other long COVID symptoms including brain fog,  
9 fatigue, and anxiety. Words indicating timing and duration of symptoms included months,  
10 days, and constantly. The only medication captured was gabapentin. Finally, similarly to the  
11 email responses, comments included mentions of sleep and being tired.

12  
13 The second Word Cloud (Figure 2) was created based on 162 comments to a  
14 Survivor Corps poll that asked respondents about vibration or buzzing sensations and  
15 neuropathic pain. This Word Cloud revealed that pain, burning, COVID, legs, hands, and  
16 feet were the most common terms mentioned in comments. This Word Cloud included terms  
17 related to sensations such as burning and symptoms such as shingles and thrush.

## 18 19 20 21 22 23 24 25 26 27 28 29 30 31 32 33 **Discussion**

34  
35 This study describes key themes and experiences among a group of individuals  
36 reporting long COVID and a prolonged and debilitating symptom complex that prominently  
37 involves internal tremors and vibrations. While symptom experiences were heterogenous—  
38 in symptom timing, medical history, and initial infection, for instance—there were also  
39 common themes in how individuals described these symptoms and their effects. Individuals  
40 also reported how diagnostic evaluation and medical care have not yet identified possible  
41 mechanisms or successful treatment for these symptoms.

42  
43 Although the causal pathway remains unclear from these patient reports alone, these  
44 patient experiences demonstrate the prolonged and debilitating symptom complex  
45 associated with long COVID. Many of the themes identified in this analysis demonstrate  
46 physical suffering, including due to severe pain (Theme 2), constancy of the tremor  
47  
48  
49  
50  
51  
52  
53  
54  
55  
56  
57

1  
2  
3 episodes (Theme 7), and tremors lasting for months or even over a year after initial  
4 infection (Theme 10). Our findings, importantly, also demonstrate how the suffering from  
5 this symptom complex invades peoples' lives, livelihood, and psychological well-being.  
6  
7 Themes included effects on mental health such as anxiety, depression, and suicidality  
8 (Theme 18) aligning with recent studies,[5, 24-26] and effects on daily functioning including  
9 inability to exercise (Theme 11), sleep deprivation (Theme 20), and even disability (Theme  
10 19). The cumulative toll of these limits on daily functioning and well-being led some people  
11 to have to quit or pause working and household or family responsibilities (Theme 21) and to  
12 fall into subsequent debt or financial distress (Theme 22). Each individual's experience with  
13 these symptoms was different, and not all experienced the most severe effects. However,  
14 the reports revealed a pattern that these symptoms could cause immense pain and  
15 disruption to daily lives and livelihood.  
16  
17

18  
19 This study extends the literature in several ways. Previous literature consists of case  
20 series that provide preliminary reports of patients' clinical presentation, course of care, and  
21 outcomes, but information on people's experience with tremors more broadly has not been  
22 described in relation to long COVID.[6-13] In addition, the literature describes symptoms  
23 from the point of view of healthcare providers, but not from patients. Previous case-series  
24 reports included a total of 16 people previously infected with SARS-CoV-2 who suffered  
25 from myoclonus-ataxia syndrome between 3 days to 6 weeks after acute, often mild, or  
26 moderate, infection.<sup>5-12</sup> Our report attempts to add a larger, broader overview of  
27 experiences of these symptoms. Our analysis expands upon the sensorimotor symptoms  
28 described to date. Furthermore, we describe symptoms experienced by individuals who  
29 might not have sought formal medical care.  
30  
31

32  
33 This study, although limited in scope, is an effort to channel the perspective of  
34 patients for a condition that has yet to be defined. The utility of this study is that it may  
35 enable more formal and structured data collection for individuals with this syndrome. These  
36  
37  
38  
39  
40  
41  
42  
43  
44  
45  
46  
47  
48  
49  
50  
51  
52  
53  
54  
55  
56  
57  
58  
59  
60

1  
2  
3 experiences should be more rigorously characterized to develop hypotheses and understand  
4 mechanisms.  
5

6  
7 There are several key implications of the work. First, internal vibrations and tremors  
8 cause severe suffering, both physically and mentally, for a group of individuals after self-  
9 reported SARS-CoV-2 infection. Second, while the overall scale of these symptoms is still  
10 unknown, this group of people experiencing the symptoms have not recovered from the  
11 symptoms nor have they received specific diagnoses or been given treatment that  
12 completely alleviates their suffering. Third, the descriptions of feeling internal vibrations and  
13 tremor symptoms were similar across this group of patients and independent of one  
14 another's responses as the emails were not seen by the other participants.  
15  
16  
17  
18  
19  
20  
21  
22

23 This study has several limitations. Respondents were a convenience sample with  
24 minimal information about their demographic or clinical characteristics, including laboratory-  
25 confirmed infection with COVID-19. Any information about testing is based on self-report.  
26 As such, we cannot determine whether these symptoms were caused by their infection with  
27 SARS-CoV-2, or whether the symptoms reported by different people were the same  
28 symptom complex or of the same etiology. We also cannot determine whether the sample is  
29 representative of the source population experiencing these symptoms. The data are self-  
30 reported and cross-sectional; information was limited to what individuals provided in their  
31 initial communication and there was no follow-up. This limited the scope of findings and  
32 may have excluded information that medical professionals would have found relevant. This  
33 sample may have been skewed toward individuals healthy enough to be active members of  
34 a patient community (Survivor Corps) and to email a response to the group. Finally, this  
35 study cannot provide information on the incidence and prevalence of these symptoms.  
36  
37  
38  
39  
40  
41  
42  
43  
44  
45  
46  
47  
48  
49

50 In conclusion, some individuals report experiencing internal vibration and tremor  
51 symptoms, often causing intense suffering, after a self-reported history of SARS-CoV-2  
52 infection. The symptoms had some common features but there was variability in timing,  
53 concomitant symptoms, and impact. Further research is needed to understand and alleviate  
54  
55  
56  
57

1  
2  
3  
4  
5  
6  
7  
8  
9  
10  
11  
12  
13  
14  
15  
16  
17  
18  
19  
20  
21  
22  
23  
24  
25  
26  
27  
28  
29  
30  
31  
32  
33  
34  
35  
36  
37  
38  
39  
40  
41  
42  
43  
44  
45  
46  
47  
48  
49  
50  
51  
52  
53  
54  
55  
56  
57  
58  
59  
60

this suffering by studying the extent and scope of these symptoms, possible mechanisms, and potential treatment.

For peer review only

### **Competing Interests Statement**

In the past 3 years, Dr. Krumholz reported receiving personal fees from Massachusetts Medical Society, UpToDate, Element Science, Eyedentify, and F-Prime. He is a cofounder of HugoHealth, Refactor Health, and Ensign-AI. He is associated with grants and/or contracts, through Yale New Haven Hospital, from the Centers for Medicare & Medicaid Services, and through Yale University from Johnson & Johnson Consumer, Janssen, and Pfizer. The other authors report no potential conflicts.

### **Contributor and Guarantor Information**

Dorothy Massey (DM) and Mitsuaki Sawano (MS) served as first coauthors. DM played a key role in planning, designing, analyzing data, and drafting the manuscript. MS critically reviewed the manuscript and took charge of the major revisions after peer review, contributing significantly as a first coauthor. Other contributors, ADB, DBG, NG, SPS, LF, CBG, CC, TZ, RS, and HMK, played crucial roles in carefully evaluating the manuscript. DBG and NG were involved in designing the project and collecting data. CBG, responsible for data analysis and manuscript drafting, contributed substantially to the revision process. HMK, in addition to planning and drafting, provided valuable supervision.

### **Transparency Statement**

DM, MS, and HK affirm that this manuscript is an honest, accurate, and transparent account of the study being reported; no important aspects of the study have been omitted; and there were no discrepancies from the study as originally planned.

### **Funding Statement**

This study received no funding.

### **Data Sharing Statement**

1  
2  
3  
4  
5  
6  
7  
8  
9  
10  
11  
12  
13  
14  
15  
16  
17  
18  
19  
20  
21  
22  
23  
24  
25  
26  
27  
28  
29  
30  
31  
32  
33  
34  
35  
36  
37  
38  
39  
40  
41  
42  
43  
44  
45  
46  
47  
48  
49  
50  
51  
52  
53  
54  
55  
56  
57  
58  
59  
60

Deidentified data will be shared by the corresponding author upon request.

**Ethics Approval**

This study involves human participants but was exempted by the Yale Institutional Review Board.

For peer review only



**REFERENCES**

1. Groff D, Sun A, Ssentongo AE, Ba DM, Parsons N, Poudel GR, et al. Short-term and long-term rates of postacute sequelae of SARS-CoV-2 infection: A systematic review. *JAMA Network Open*. 2021;4(10):e2128568-e.
2. Davis HE, Assaf GS, McCorkell L, Wei H, Low RJ, Re'em Y, et al. Characterizing long COVID in an international cohort: 7 months of symptoms and their impact. *EClinicalMedicine*. 2021;38.
3. Carfi A, Bernabei R, Landi F. Persistent symptoms in patients after acute COVID-19. *JAMA*. 2020;324(6):603-5.
4. Huang C, Huang L, Wang Y, Li X, Ren L, Gu X, et al. 6-month consequences of COVID-19 in patients discharged from hospital: a cohort study. *The Lancet*. 2021;397(10270):220-32.
5. Thaweethai T, Jolley SE, Karlson EW, Levitan EB, Levy B, McComsey GA, et al. Development of a definition of postacute sequelae of SARS-CoV-2 infection. *JAMA*. 2023;329(22):1934-46.
6. Przytuła F, Błądek S, Sławek J. Two COVID-19-related video-accompanied cases of severe ataxia-myoclonus syndrome. *Neurol Neurochir Pol*. 2021;55(3):310-3.
7. Schellekens MMI, Bleeker-Rovers CP, Keurlings PAJ, Mummery CJ, Bloem BR. Reversible myoclonus-ataxia as a postinfectious manifestation of COVID-19. *Mov Disord Clin Pract*. 2020;7(8):977-9.
8. Emamikhah M, Babadi M, Mehrabani M, Jalili M, Pouranian M, Daraie P, et al. Opsoclonus-myoclonus syndrome, a post-infectious neurologic complication of COVID-19: case series and review of literature. *J Neurovirol*. 2021;27(1):26-34.
9. Shah PB, Desai SD. Opsoclonus myoclonus ataxia syndrome in the setting of COVID-19 infection. *Neurology*. 2021;96(1):33.

10. Dijkstra F, Van den Bossche T, Willekens B, Cras P, Crosiers D. Myoclonus and cerebellar ataxia following Coronavirus Disease 2019 (COVID-19). *Mov Disord Clin Pract.* 2020;7(8):974-6.
11. Grimaldi S, Lagarde S, Harlé JR, Boucraut J, Guedj E. Autoimmune encephalitis concomitant with SARS-CoV-2 infection: Insight from (18)F-FDG PET imaging and neuronal autoantibodies. *J Nucl Med.* 2020;61(12):1726-9.
12. Foucard C, San-Galli A, Tarrano C, Chaumont H, Lannuzel A, Roze E. Acute cerebellar ataxia and myoclonus with or without opsoclonus: A para-infectious syndrome associated with COVID-19. *Eur J Neurol.* 2021;28(10):3533-6.
13. Wright D, Rowley R, Halks-Wellstead P, Anderson T, Wu TY. Abnormal saccadic oscillations associated with severe acute respiratory syndrome Coronavirus 2 encephalopathy and ataxia. *Mov Disord Clin Pract.* 2020;7(8):980-2.
14. Chan JL, Murphy KA, Sarna JR. Myoclonus and cerebellar ataxia associated with COVID-19: a case report and systematic review. *J Neurol.* 2021;268(10):3517-48.
15. Della Corte M, Delehayé C, Savastano E, De Leva MF, Bernardo P, Varone A. Neuropsychiatric syndrome with myoclonus after SARS-CoV-2 infection in a paediatric patient. *Clin Neurol Neurosurg.* 2022;213:107121.
16. Anand P, Zakaria A, Benameur K, Ong C, Putman M, O'Shea S, et al. Myoclonus in patients with coronavirus disease 2019: A multicenter case series. *Crit Care Med.* 2020;48(11):1664-9.
17. Massey D, Berrent D, Krumholz H. Breakthrough symptomatic COVID-19 infections leading to long covid: Report from long covid Facebook group poll. *medRxiv.* 2021:2021.07.23.21261030.
18. Lambert NJ, Survivor Corps. COVID-19 "long hauler" symptoms survey report 2020 [Available from: <https://dig.abcclocal.go.com/wls/documents/2020/072720-wls-covid-symptom-study-doc.pdf>].

- 1  
2  
3 19. Lambert N, Survivor Corps, El-Azab SA, Ramrakhiani NS, Barisano A, Yu L, et al.  
4 COVID-19 survivors' reports of the timing, duration, and health impacts of post-acute  
5 sequelae of SARS-CoV-2 (PASC) infection. medRxiv. 2021:2021.03.22.21254026.  
6  
7
- 8  
9 20. Crabtree BF, Miller WL. Doing qualitative research. 2nd ed. Thousand Oaks, Calif.:  
10 Sage Publications; 1999. xvii, 406 p. p.  
11
- 12  
13 21. Miles MB, Huberman AM. Qualitative data analysis: An expanded sourcebook. 2nd  
14 ed. Thousand Oaks: Sage Publications; 1994. 1 online resource p.  
15
- 16  
17 22. Benoit K WK, Wang H, Nulty P, Obeng A, Müller S, Matsuo A. quanteda: An R  
18 package for the quantitative analysis of textual data. Journal of Open Source Software.  
19  
20 2018;3(30):774.  
21
- 22  
23 23. Feinerer I, Hornik K, Meyer D. Text mining infrastructure in R. Journal of Statistical  
24 Software. 2008;25(5):1 - 54.  
25
- 26  
27 24. Gasnier M, Choucha W, Radiguer F, Faulet T, Chappell K, Bougarel A, et al.  
28 Comorbidity of long COVID and psychiatric disorders after a hospitalisation for COVID-19: a  
29 cross-sectional study. J Neurol Neurosurg Psychiatry. 2022.  
30  
31
- 32  
33 25. Wang S, Quan L, Chavarro JE, Slopen N, Kubzansky LD, Koenen KC, et al.  
34 Associations of depression, anxiety, worry, perceived stress, and loneliness prior to infection  
35 with risk of post-COVID-19 conditions. JAMA Psychiatry. 2022;79(11):1081-91.  
36  
37
- 38  
39 26. Xie Y, Xu E, Al-Aly Z. Risks of mental health outcomes in people with covid-19:  
40 Cohort study. BMJ. 2022;376:e068993.  
41  
42  
43  
44  
45  
46  
47  
48  
49  
50  
51  
52  
53  
54  
55  
56  
57

1  
2  
3  
4  
5  
6  
7  
8  
9  
10  
11  
12  
13  
14  
15  
16  
17  
18  
19  
20  
21  
22  
23  
24  
25  
26  
27  
28  
29  
30  
31  
32  
33  
34  
35  
36  
37  
38  
39  
40  
41  
42  
43  
44  
45  
46  
47  
48  
49  
50  
51  
52  
53  
54  
55  
56  
57  
58  
59  
60

Figure Legend:

Figure 1 - Word Cloud from comments in response to a post

Figure 2 - Word Cloud from comments on a Survivor Corps poll

For peer review only





## Supplement 1

To solicit emails for this study, Survivor Corps and Nick Güthe requested emails from Survivor Corps members via Facebook and an emailed newsletter that is also posted on the Survivor Corps website.

First, Nick Güthe posted the following in the Survivor Corps Facebook page [July 2021]:

*"Hi, to anyone on this group. It's Nick Güthe, Heidi Ferrer's husband. A study is forming with a top doctor for Long Haulers with Neurological tremors similar to Heidi Ferrer's -- Tremors or internal vibrations. If you have these symptoms and want to be included please comment below. This isn't a clinical trial but an attempt to gather data and stories to help get funding, bring attention to these symptoms which are so destructive to any Long Haulers physical and mental health."*

Nick Güthe and Diana Zicklin Berrent responded to Facebook comments on this post to ask members to email their story, writing: "Send your story to [hq@survivorcorps.com](mailto:hq@survivorcorps.com)."

Second, a [newsletter](#) sent to members included the following [July 2021]:

*"A study is forming for Long Haulers with Neurological tremors or internal vibrations. If you have these symptoms and want to be included, please **EMAIL** us with your details. This is not a clinical trial, but an attempt to gather data and stories to help get funding, and bring attention to these destructive symptoms that impact Long Hauler's physical and mental health."*

## Supplement 2. Email Initial Code List

Below is listed the initial code list created by authors HMK and DM, prior to input from all team members and creation of the final code.

### 1) Symptom Perception and Location

Vibrations and tremors were described concomitantly, with descriptions of internal vibrations, visible tremors, and some people experiencing both.

Vibration or tremor site varied, from the entire body to localization in extremities, chest, abdomen and other locations.

Vibrations and tremors occurred with other symptoms of varying number.

Vibrations and tremors could cause severe pain.

### 2) Initial Symptom Onset

Vibration and tremor initial onset varied, from the day of initial infection to weeks later.

Vibrations and tremors occurred following or during acute COVID-19 infections that varied from mild to severe.

### 3) Symptom Timing

Vibration and tremor episodes could be brief, or could be prolonged, even constant.

Vibration and tremor episodes could occur constantly, daily, or only when relapses occurred.

People experienced vibrations and tremors over different time periods (even if they were episodic), and some did not have improvement in symptoms after more than a year.

### 4) Symptom triggers or alleviators

The vaccine was associated with both improvement in symptoms for some people, and a relapse in symptoms for others.

Exercise and activity were associated with onsets of tremors and vibrations.

A variety of self-treatment strategies, such as diet modifications and humming, were used to alleviate tremors and vibrations.

### 5) Change from Baseline Health Status



1  
2  
3 People with vibrations and tremors had varying health states before their COVID-19 infection, from  
4 those who were completely health to those with pre-existing conditions.  
5

## 6) Experience with Medical Establishment

8  
9 Medical testing failed to reveal the mechanism of either tremors or vibrations.  
10

11 Tremor and vibration symptoms were sometimes doubted or dismissed by doctors.  
12

13 Medications have been provided for tremor symptoms, with varying results.  
14  
15

## 7) Effect on People's Lives and Livelihood

17  
18 Vibrations and tremors were associated with mental health effects, ranging from anxiety to suicidal  
19 thoughts.  
20

21 Vibration and tremor symptoms could cause disability people.  
22

23  
24 Vibration and tremor symptoms could cause financial stress, through a combination of medical care  
25 costs and loss of income from medical leave.  
26

27 Vibrations and tremors could disturb or prevent sleep.  
28

29 Vibration and tremor symptoms could prevent people from working or carrying out daily life activities.  
30  
31  
32  
33  
34  
35  
36  
37  
38  
39  
40  
41  
42  
43  
44  
45  
46  
47  
48  
49  
50  
51  
52  
53  
54  
55  
56  
57  
58  
59  
60

### Supplement 3. World Cloud Analysis Methodology

Leveraging the "quanteda" [1], "wordcloud" [2], and "tm" [3] packages in R, we constructed a Word Cloud of the most frequent words used to express some long-term effects of experiencing a COVID-19 infection among a Facebook COVID-19 survivors page. The data was converted from an xlsx to a txt file where it was then loaded as a corpus file, a specific type of file format required for Word Cloud generation, using the "Corpus" function in the "quanteda" package. To clean the corpus file, we utilized the "tm\_map" function in the "tm" package to convert all text to lower case, to remove numbers, to remove punctuation and special characters, and then to collapse extra white space characters to a single blank space. Once cleaned, we built a term-document matrix which was then read into the "wordcloud" function within the "wordcloud" package. We set the minimum frequency of words to be included into the Word Cloud to 3, the maximum number of words allowed into the Word Cloud to 200, and then removed all extraneous, filler words such as "and", "comment", "view", "you." We included all adjectives, nouns, and verbs associated with COVID signs, symptoms, and experiences into the Word Cloud.

#### Works Cited

- [1] K. Benoit, K. Watanabe, H. Wang, P. Nulty, A. Obeng, S. Muller and A. Matsuo, "quanteda: An R package for the quantitative analysis of textual data," *Journal of Open Source Software*, vol. 3, no. 30, p. 774, 2018.
- [2] I. Fellows, "wordcloud: Word Clouds. R package version 2.6," 2018. [Online]. Available: <https://CRAN.R-project.org/package=wordcloud>.
- [3] I. Feinerer and K. Hornik, "Text Mining Infrastructure in R. R package version 0.8-8," *Journal of Statistical Software*, vol. 25, no. 5, pp. 1-54, 2008.

### Supplemental Table 1. Full Survivor Corps Poll for Word Cloud 2

The following poll was posted in Survivor Corps [June 2021] and was titled "Vibration/Buzzing/Pain Poll." There were 20 answer choices, each a statement relevant to vibration, tingling, buzzing, and neuropathic sensations. We have included the poll and responses for context, but for the purposes of qualitative analysis, we reviewed only the comments posted in response to this poll. These poll responses were collected as of July 16, 2021. The following text was included with the Facebook poll:

*"VIBRATION / BUZZING / PAIN POLL*

*SO MANY LONG HAULERS ARE DESCRIBING A BUZZING OR VIBRATION OR*

*NEUROPATHIC PAIN IN THEIR BODIES AND EXTREMITIES - WE WANT TO LEARN*

*MORE!"*

| <b>Answer Choice</b>                                                        | <b>Number of Votes</b> |
|-----------------------------------------------------------------------------|------------------------|
| I am participating in this poll (please check here!)                        | 769                    |
| I HAVE experienced new tingling / buzzing / vibrating feelings since Covid  | 660                    |
| These vibrating feelings come and go                                        | 590                    |
| I HAVE had neuropathic pain (burning feeling on skin) since Covid           | 396                    |
| These vibrations appear in different parts of my body at different times    | 365                    |
| The neuropathic pain (burning feeling on skin) comes and goes               | 345                    |
| I have these vibrating feelings mostly in my extremities                    | 268                    |
| These vibrations bother me a great deal                                     | 252                    |
| My neuropathic pain (burning feeling on skin) has been in my hands and feet | 232                    |
| The neuropathic pain (burning feeling on skin) bothers me a great deal      | 232                    |
| My neuropathic pain (burning feeling on skin has been all over my body)     | 149                    |

|    |                                                                             |     |
|----|-----------------------------------------------------------------------------|-----|
| 1  | These vibrations feel "like they are making me insane"                      | 129 |
| 2  |                                                                             |     |
| 3  | I have NOT had neuropathic pain (burning feeling on skin) since Covid       | 111 |
| 4  |                                                                             |     |
| 5  | I have these vibrating feelings mostly in my chest                          | 98  |
| 6  |                                                                             |     |
| 7  | The neuropathic pain (burning feeling on skin) is excruciating / makes me   | 67  |
| 8  | feel "like I'm going insane"                                                |     |
| 9  |                                                                             |     |
| 10 | I have NOT experienced any new tingling / buzzing/ vibrating feelings since | 48  |
| 11 | Covid                                                                       |     |
| 12 |                                                                             |     |
| 13 | The neuropathic pain (burning feeling on skin) is constant                  | 44  |
| 14 |                                                                             |     |
| 15 | These vibrating feelings are constant                                       | 35  |
| 16 |                                                                             |     |
| 17 | These vibrations don't bother me                                            | 22  |
| 18 |                                                                             |     |
| 19 | The neuropathic pain (burning feeling on skin) doesn't bother me very       | 21  |
| 20 | much                                                                        |     |
| 21 |                                                                             |     |
| 22 |                                                                             |     |
| 23 |                                                                             |     |
| 24 |                                                                             |     |
| 25 |                                                                             |     |
| 26 |                                                                             |     |
| 27 |                                                                             |     |
| 28 |                                                                             |     |
| 29 |                                                                             |     |
| 30 |                                                                             |     |
| 31 |                                                                             |     |
| 32 |                                                                             |     |
| 33 |                                                                             |     |
| 34 |                                                                             |     |
| 35 |                                                                             |     |
| 36 |                                                                             |     |
| 37 |                                                                             |     |
| 38 |                                                                             |     |
| 39 |                                                                             |     |
| 40 |                                                                             |     |
| 41 |                                                                             |     |
| 42 |                                                                             |     |
| 43 |                                                                             |     |
| 44 |                                                                             |     |
| 45 |                                                                             |     |
| 46 |                                                                             |     |
| 47 |                                                                             |     |
| 48 |                                                                             |     |
| 49 |                                                                             |     |
| 50 |                                                                             |     |
| 51 |                                                                             |     |
| 52 |                                                                             |     |
| 53 |                                                                             |     |
| 54 |                                                                             |     |
| 55 |                                                                             |     |
| 56 |                                                                             |     |
| 57 |                                                                             |     |
| 58 |                                                                             |     |
| 59 |                                                                             |     |
| 60 |                                                                             |     |

**Supplemental Figure 1. Data Collection Process**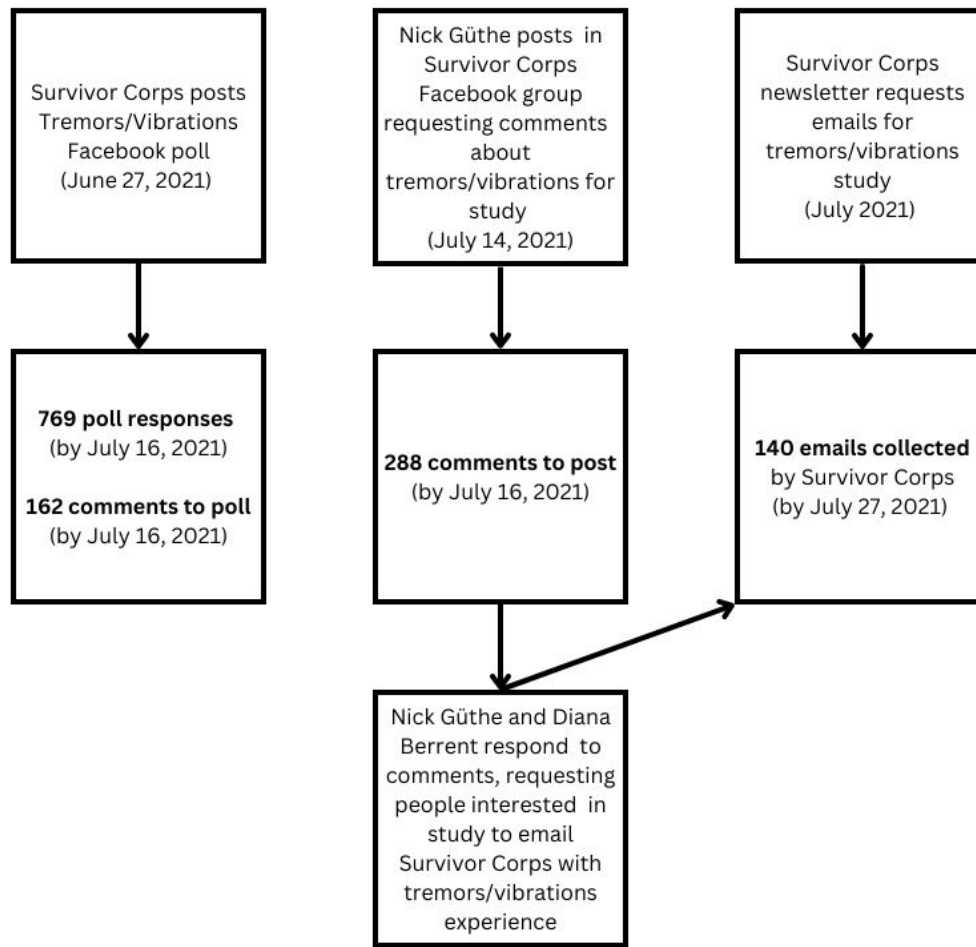

## Supplemental Figure 2. Roadmap of themes and domains

### Domain 1. Symptom Experience, Description, and Anatomic Location

**Theme 1.** Vibrations and tremors were described concomitantly, with descriptions of internal vibrations, visible tremors, and some people experiencing both.

**Theme 2.** Vibration or tremor site varied, from the entire body to localization in extremities, chest, abdomen, and other locations.

**Theme 3.** Vibrations and tremors occurred with other symptoms of varying number.

**Theme 4.** Vibrations and tremors could cause severe pain.

### Domain 2. Initial Symptom Onset

**Theme 5.** Vibration and tremor initial onset varied, from the day of initial infection to weeks or even months later.

**Theme 6.** Vibrations and tremors occurred following or during acute COVID-19 infections that varied from mild to severe.

### Domain 3. Symptom Timing

**Theme 7.** Vibration and tremor episodes could be brief, or could be prolonged, even constant.

**Theme 8.** Vibration and tremor episodes could occur constantly, daily, or only when relapses occurred.

**Theme 9.** Vibration and tremor symptoms could completely resolve temporarily and could return up to months later.

**Theme 10.** People experienced vibrations and tremors over different time periods (even if they were episodic), and some did not have improvement in symptoms after more than a year.

### Domain 4. Symptom triggers or alleviators

**Theme 11.** Exercise and activity were associated for some with onsets of tremors and vibrations.

**Theme 12.** A variety of self-treatment strategies, such as diet modifications and humming, were used to alleviate tremors and vibrations.

### Domain 5. Change from Baseline Health Status

**Theme 13.** People with vibrations and tremors had varying health states before their COVID-19 infection, from those who were completely healthy to those with pre-existing conditions.

### Domain 6. Experience with Medical Establishment

**Theme 14.** Medical testing failed to reveal the mechanism of either tremors or vibrations.

**Theme 15.** Tremor and vibration symptoms were sometimes doubted or dismissed by doctors.

**Theme 16.** The vaccine was associated with both improvement in symptoms for some people, and a relapse in symptoms for others.

**Theme 17.** Medications have been provided for tremor symptoms, with varying results.

### Domain 7. Impact on People's Lives and Livelihood

**Theme 18.** Vibrations and tremors were associated with mental health effects, including anxiety, depression, and suicidal thoughts.

**Theme 19.** Vibration and tremor symptoms caused disability for some people.

**Theme 20.** Vibrations and tremors could disturb or prevent sleep.

**Theme 21.** Vibration and tremor symptoms could prevent people from working or carrying out daily life activities.

**Theme 22.** Vibration and tremor symptoms could cause financial stress, through a combination of medical care costs and loss of income from medical leave.

www.bmjopen.com
